# Supplementary material for: Reactome from a WikiPathways Perspective
Source: PubMed Central journal article supplement (PMC4874630; doi:10.1371/journal.pcbi.1004941), 2016-05-20
Supplement: pcbi.1004941.s006.pdf [file pcbi.1004941.s006.pdf]

Quality Control & Pre-processing Evaluation

of  
CEL\_files\_0

**REPORT**

## Array names and grouping

| ArrayDataFile           | SourceName | FactorValue |
|-------------------------|------------|-------------|
| GSM850527_RSN-11.CEL.gz | Array1     | Control     |
| GSM850528_RSN-12.CEL.gz | Array2     | Control     |
| GSM850529_RSN-13.CEL.gz | Array3     | Control     |
| GSM850530_RSN-10.CEL.gz | Array4     | PCOS        |
| GSM850531_RSN-14.CEL.gz | Array5     | PCOS        |
| GSM850532_RSN-16.CEL.gz | Array6     | PCOS        |
| GSM850533_RSN-17.CEL.gz | Array7     | PCOS        |
| GSM850534_RSN-2.CEL.gz  | Array8     | PCOS        |
| GSM850535_RSN-4.CEL.gz  | Array9     | PCOS        |
| GSM850536_RSN-5.CEL.gz  | Array10    | PCOS        |

# Summary of raw data quality indicators

blue = "within" / red = "out of" recommended cut-off

|         | 3'/5' beta-actin<br>(cutoff=3) | 3'/5' GAPDH<br>(cutoff=1.25) | Hybridization<br>BioB<BioC<BioD<CreX | Hybridization<br>BioB=Present | Percent Present<br>spread<=10% | Background<br>spread<=20% | Log Scale Factor<br>spread<=3 |
|---------|--------------------------------|------------------------------|--------------------------------------|-------------------------------|--------------------------------|---------------------------|-------------------------------|
| Array1  | 1.43                           | 1.57                         | T                                    | P                             | 36 %                           | 39                        | 1.76                          |
| Array2  | 1.2                            | 1.07                         | T                                    | P                             | 49 %                           | 38                        | 0.17                          |
| Array3  | 1.2                            | 1.08                         | T                                    | P                             | 46 %                           | 41                        | 0.48                          |
| Array4  | 1.11                           | 1.16                         | T                                    | P                             | 43 %                           | 43                        | 0.83                          |
| Array5  | 1.15                           | 1.1                          | T                                    | P                             | 50 %                           | 36                        | 0.24                          |
| Array6  | 1.08                           | 1.05                         | T                                    | P                             | 45 %                           | 45                        | 0.89                          |
| Array7  | 1.1                            | 1.08                         | T                                    | P                             | 49 %                           | 40                        | 0.43                          |
| Array8  | 1.08                           | 1.04                         | T                                    | P                             | 42 %                           | 32                        | 2.39                          |
| Array9  | 1.04                           | 1                            | T                                    | A                             | 35 %                           | 47                        | 2.01                          |
| Array10 | 1.04                           | 1                            | T                                    | P                             | 35 %                           | 49                        | 2.21                          |

# RNA degradation of beta-actin

3'/5' and 3'/M ratios

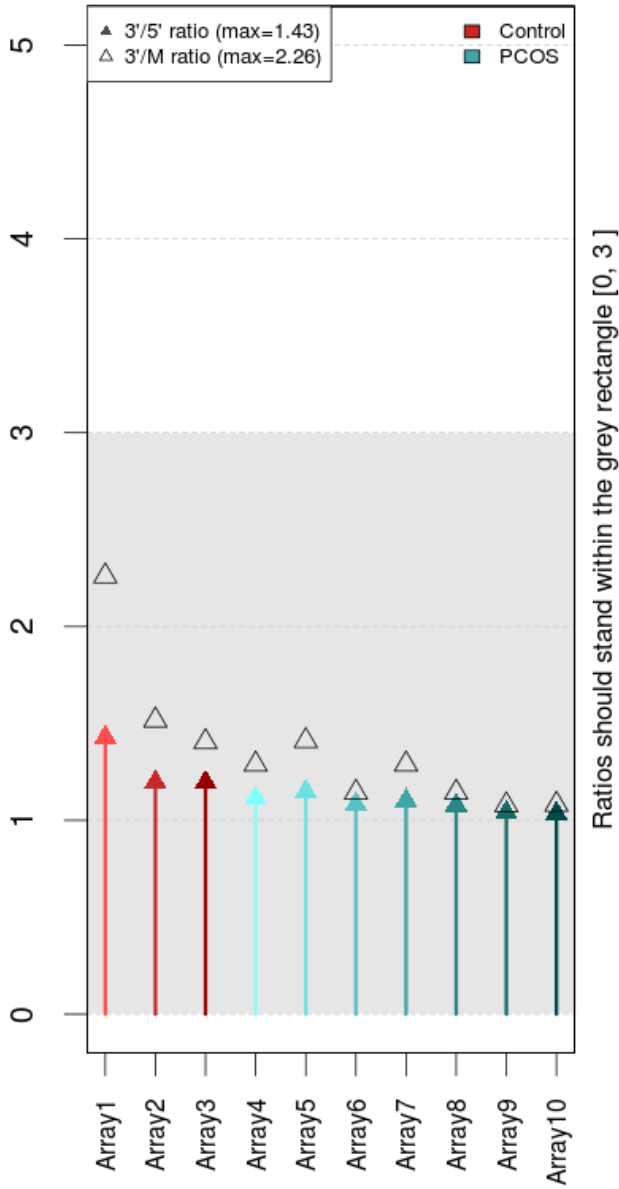

# Boxplot of beta-actin ratios

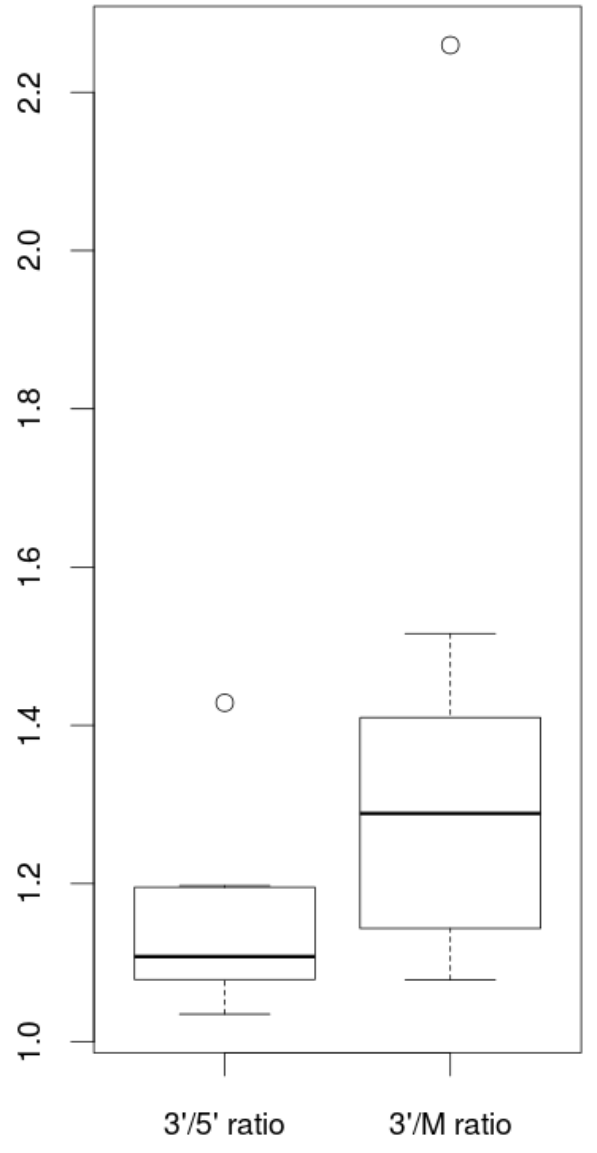

beta-actin QC: OK (all 3'/5' ratios < 3)

# RNA degradation of GAPDH

3'/5' and 3'/M ratios

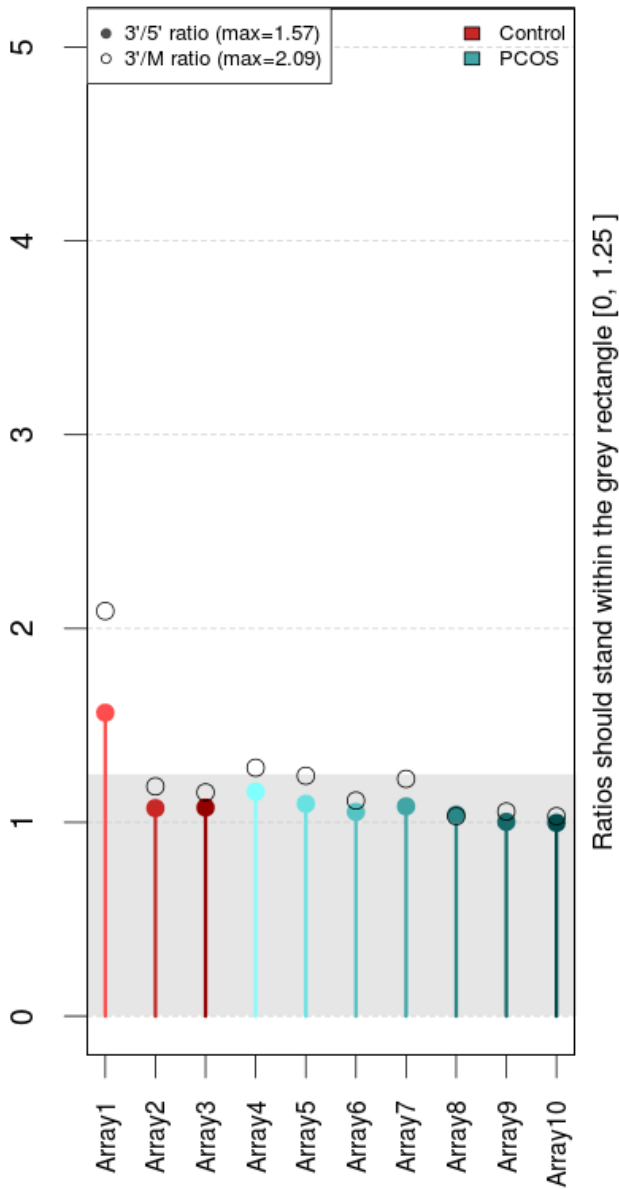

# Boxplot of GAPDH ratios

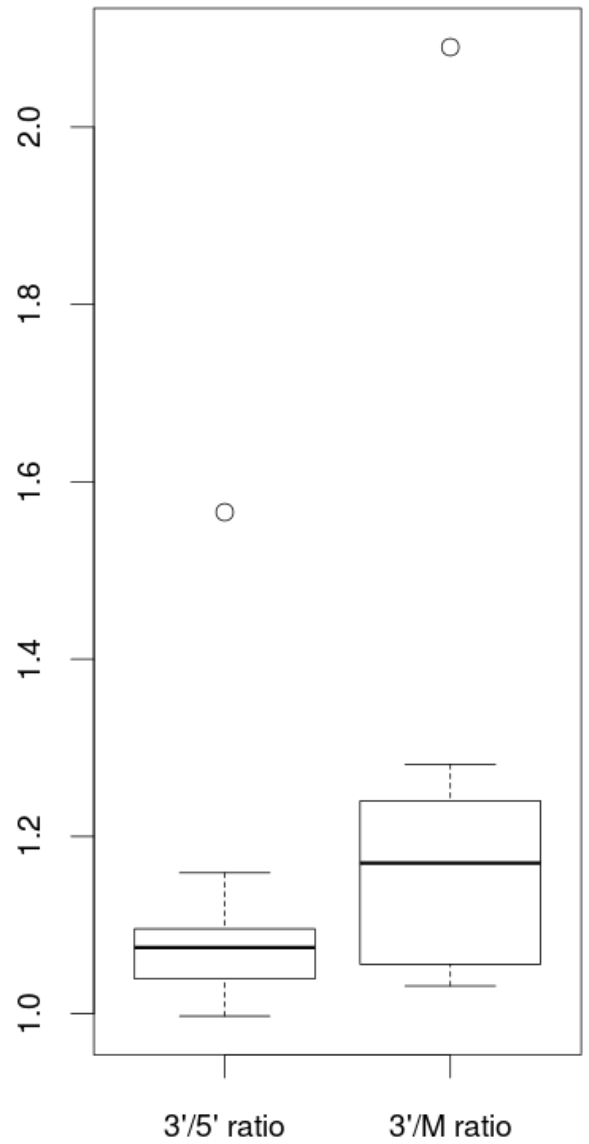

GAPDH QC: not OK (some 3'/5' ratios >1.25)  
 Note that the threshold of 1.25 was determined for Homo Sapiens.

# RNA degradation plot

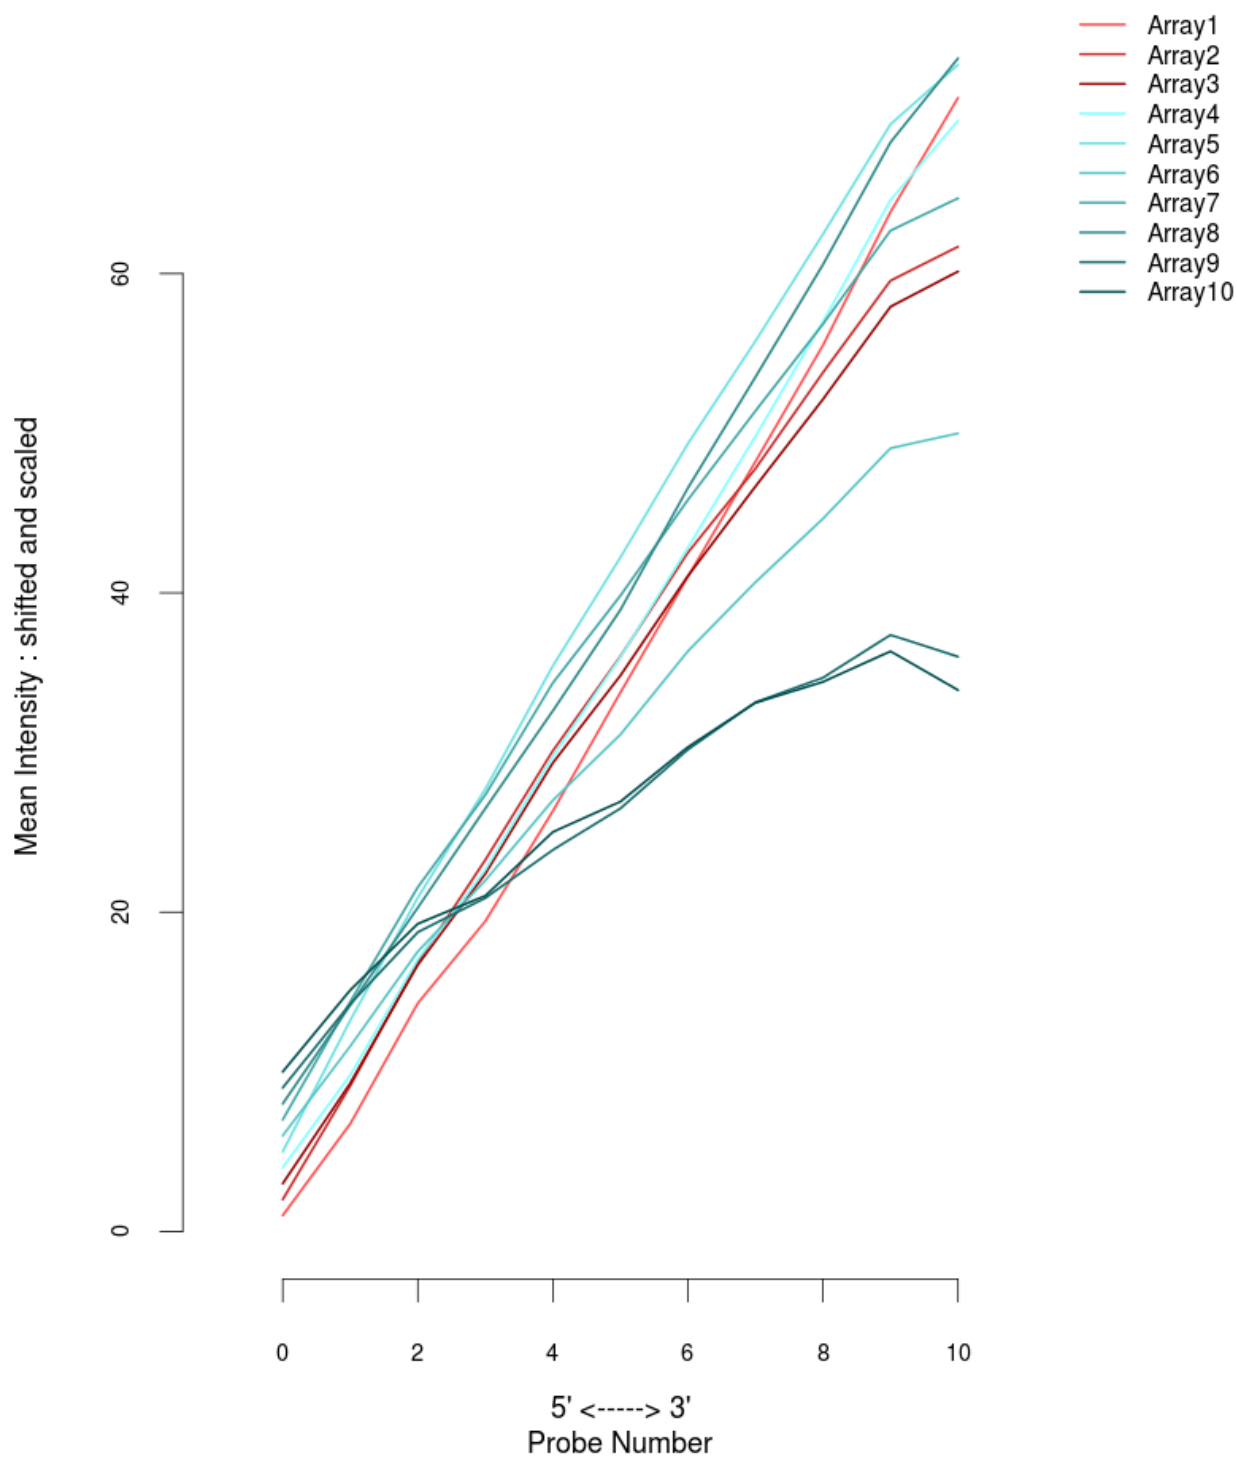

# Spike-in Hybridization controls intensities and calls

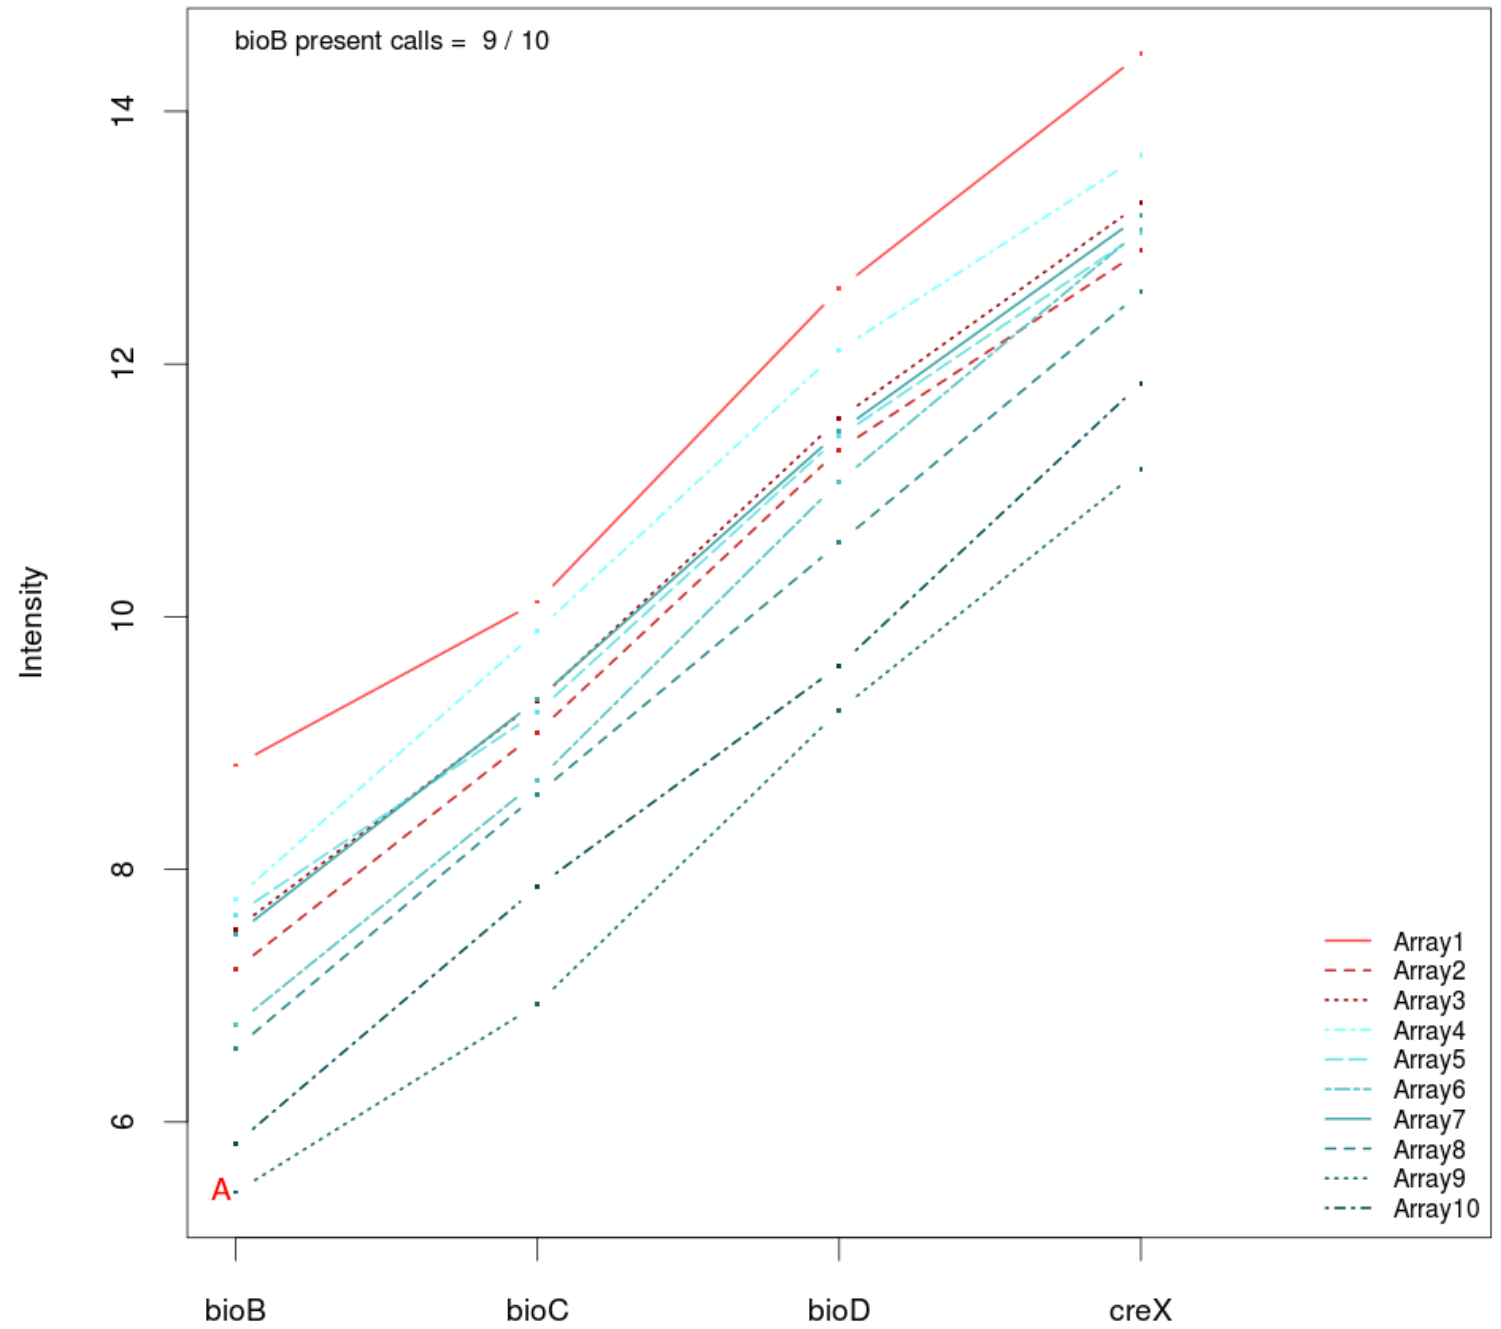

Intensities: OK (bioB < bioC < bioD < creX for all arrays)  
BioB present calls: not OK ( 1 / 10 bioB not called present)

# Plot of background intensity

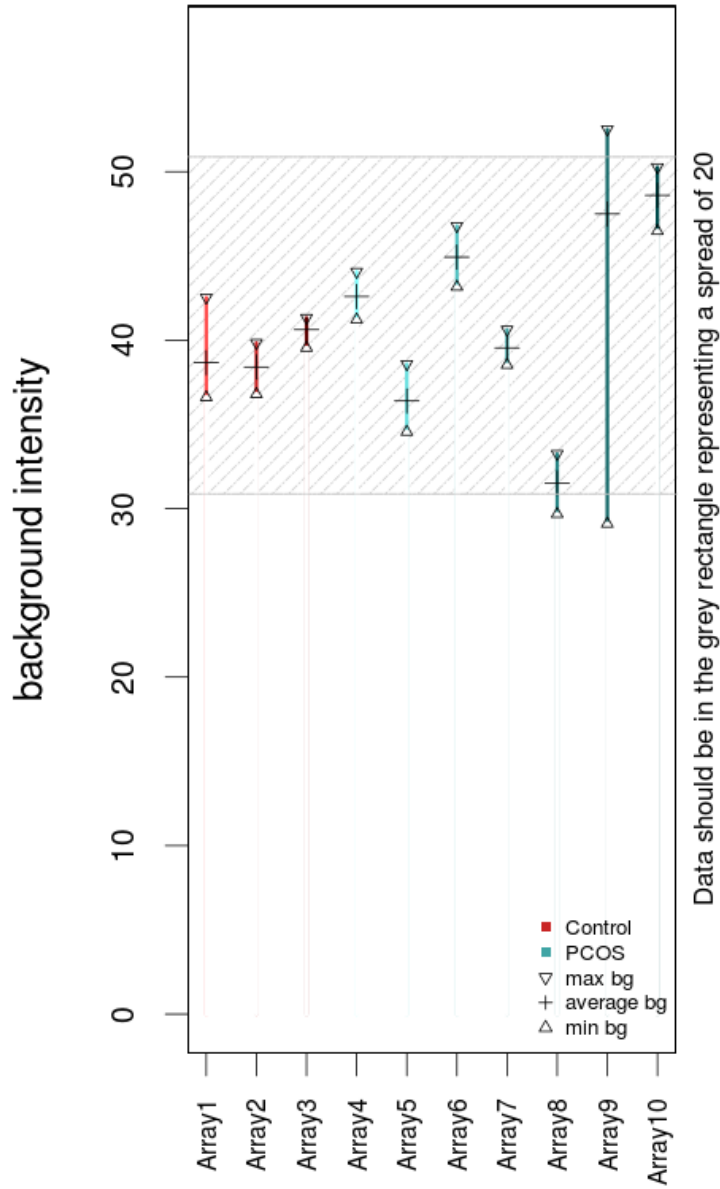

# Average background intensity

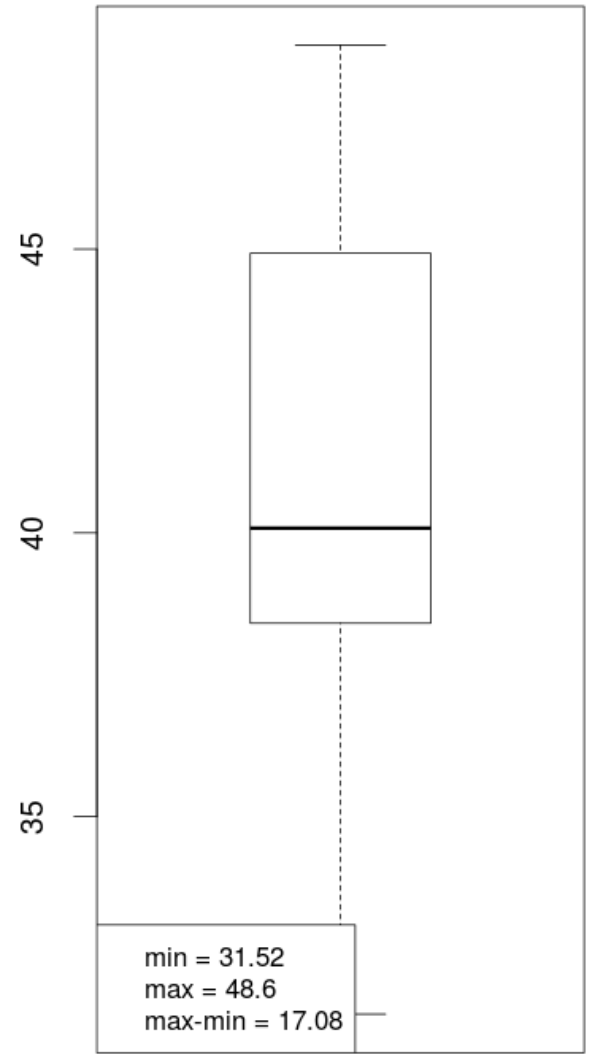

Background QC: OK (spread <= 20)



# Plot of percent present

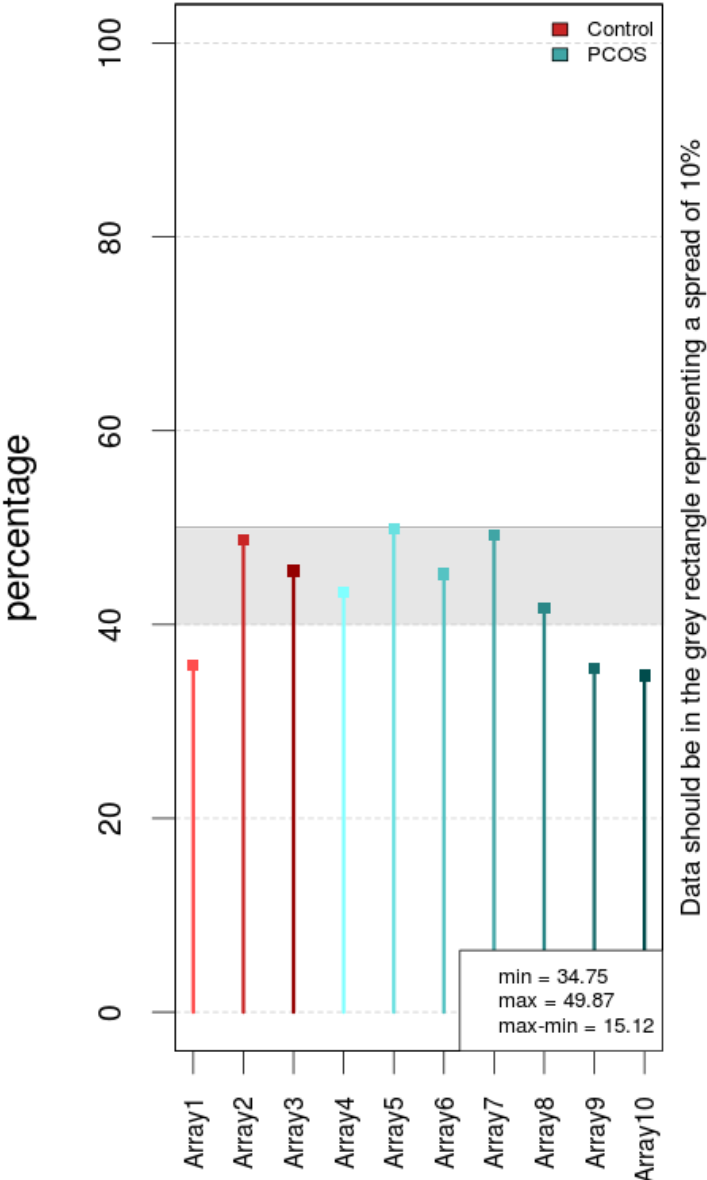

# Boxplot of percent present

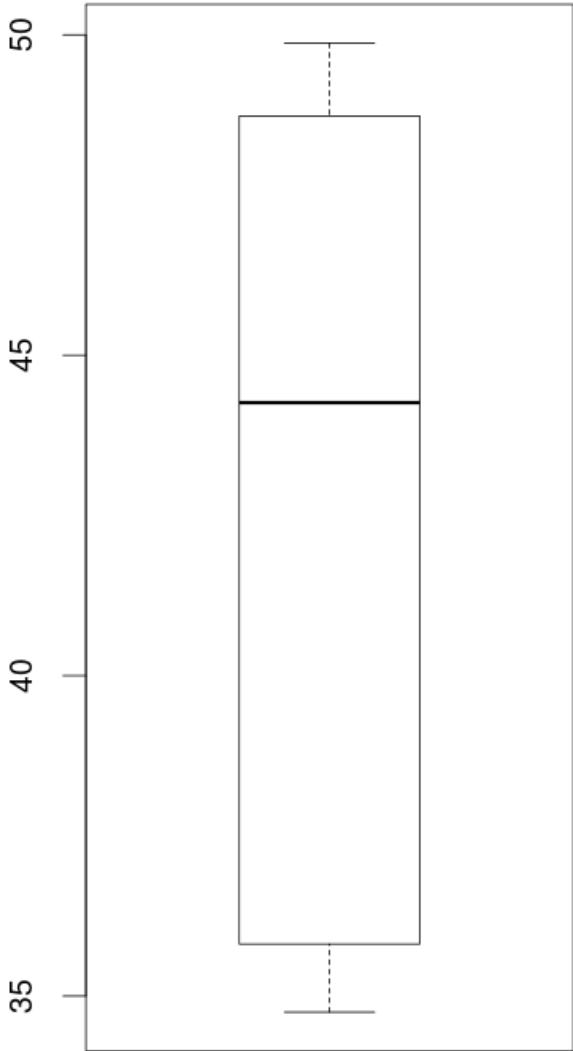

Percent present QC: not OK (spread > 10%)

# affx control profiles

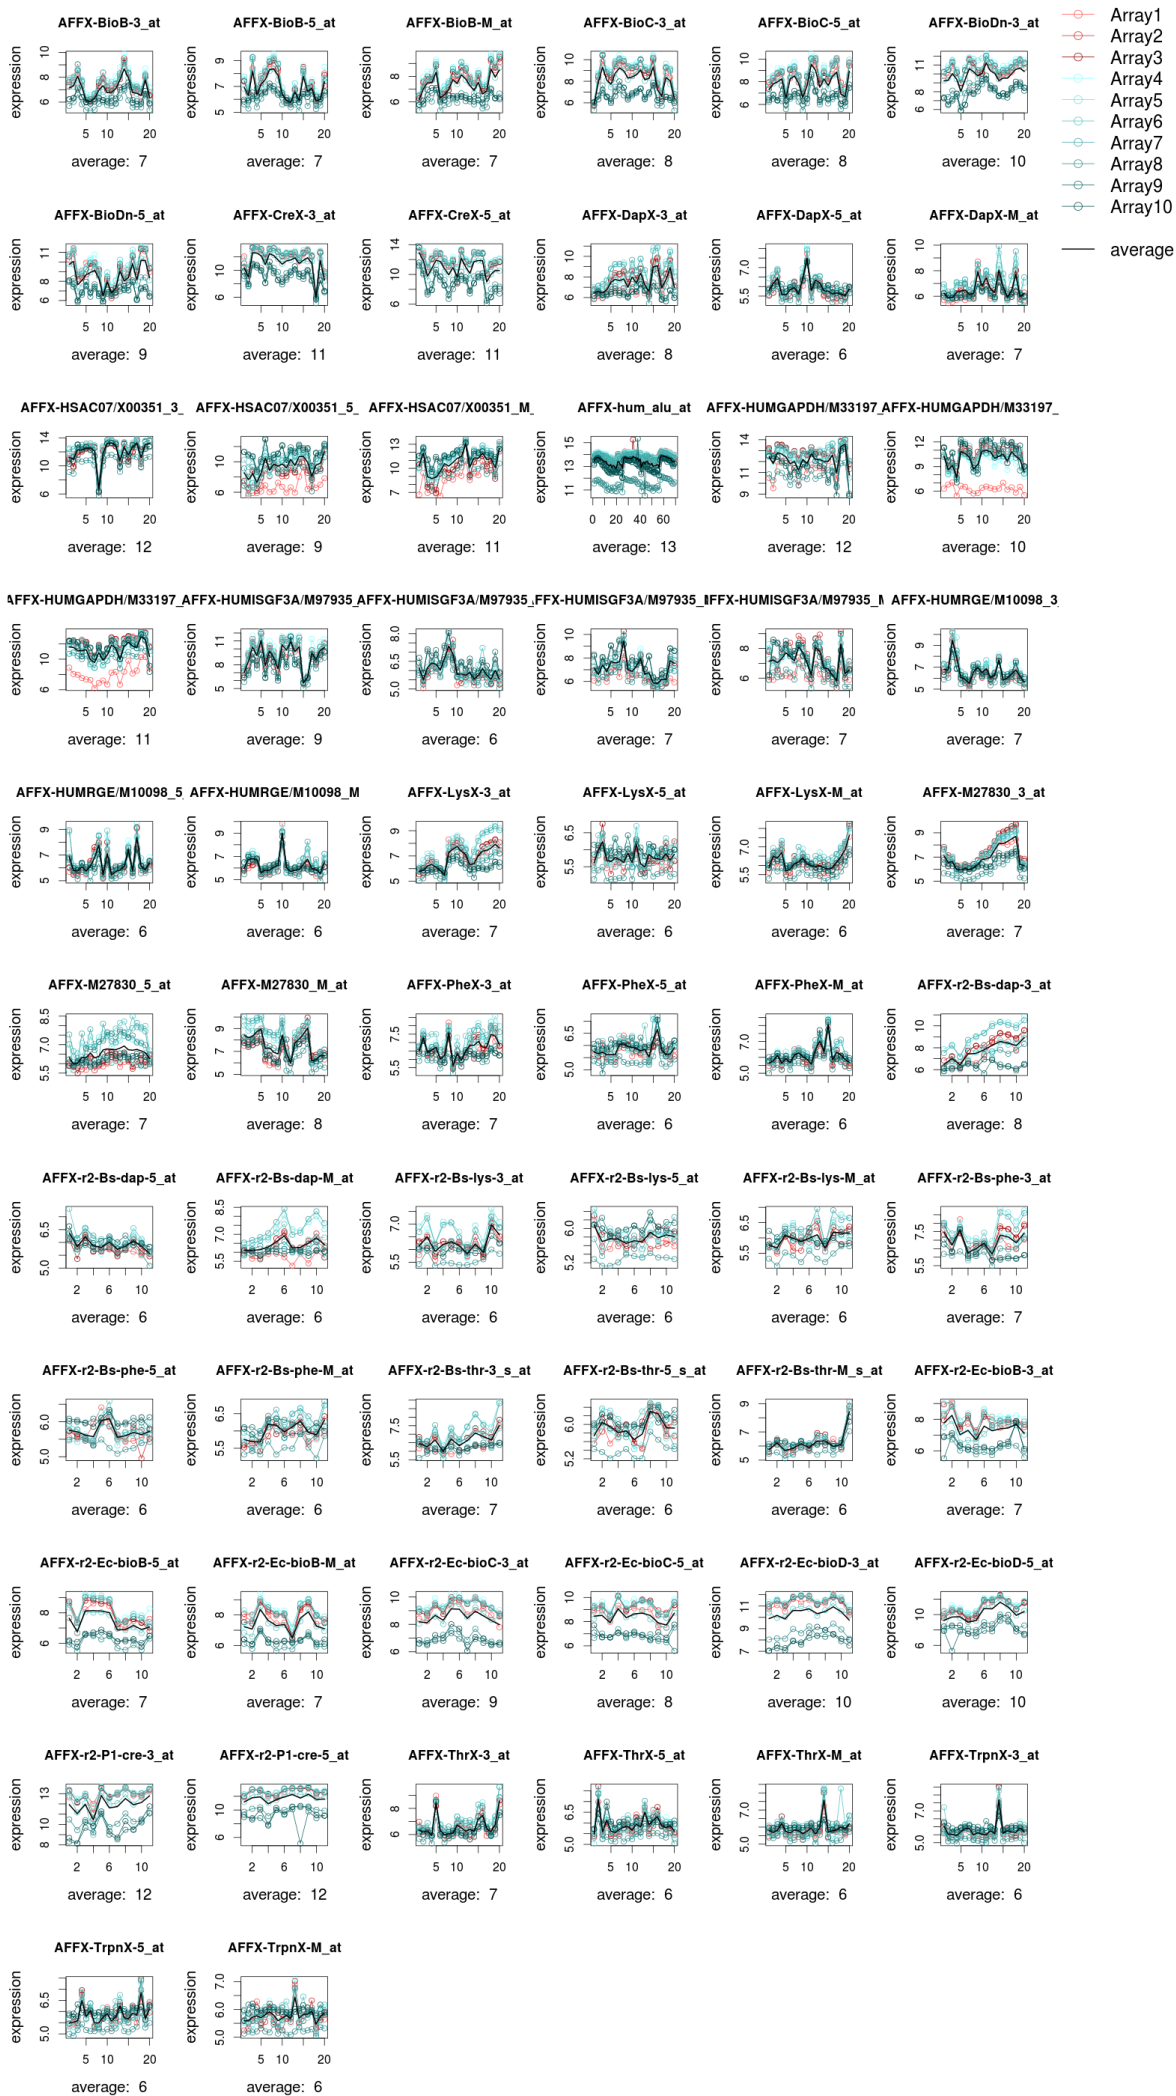

# affx controls

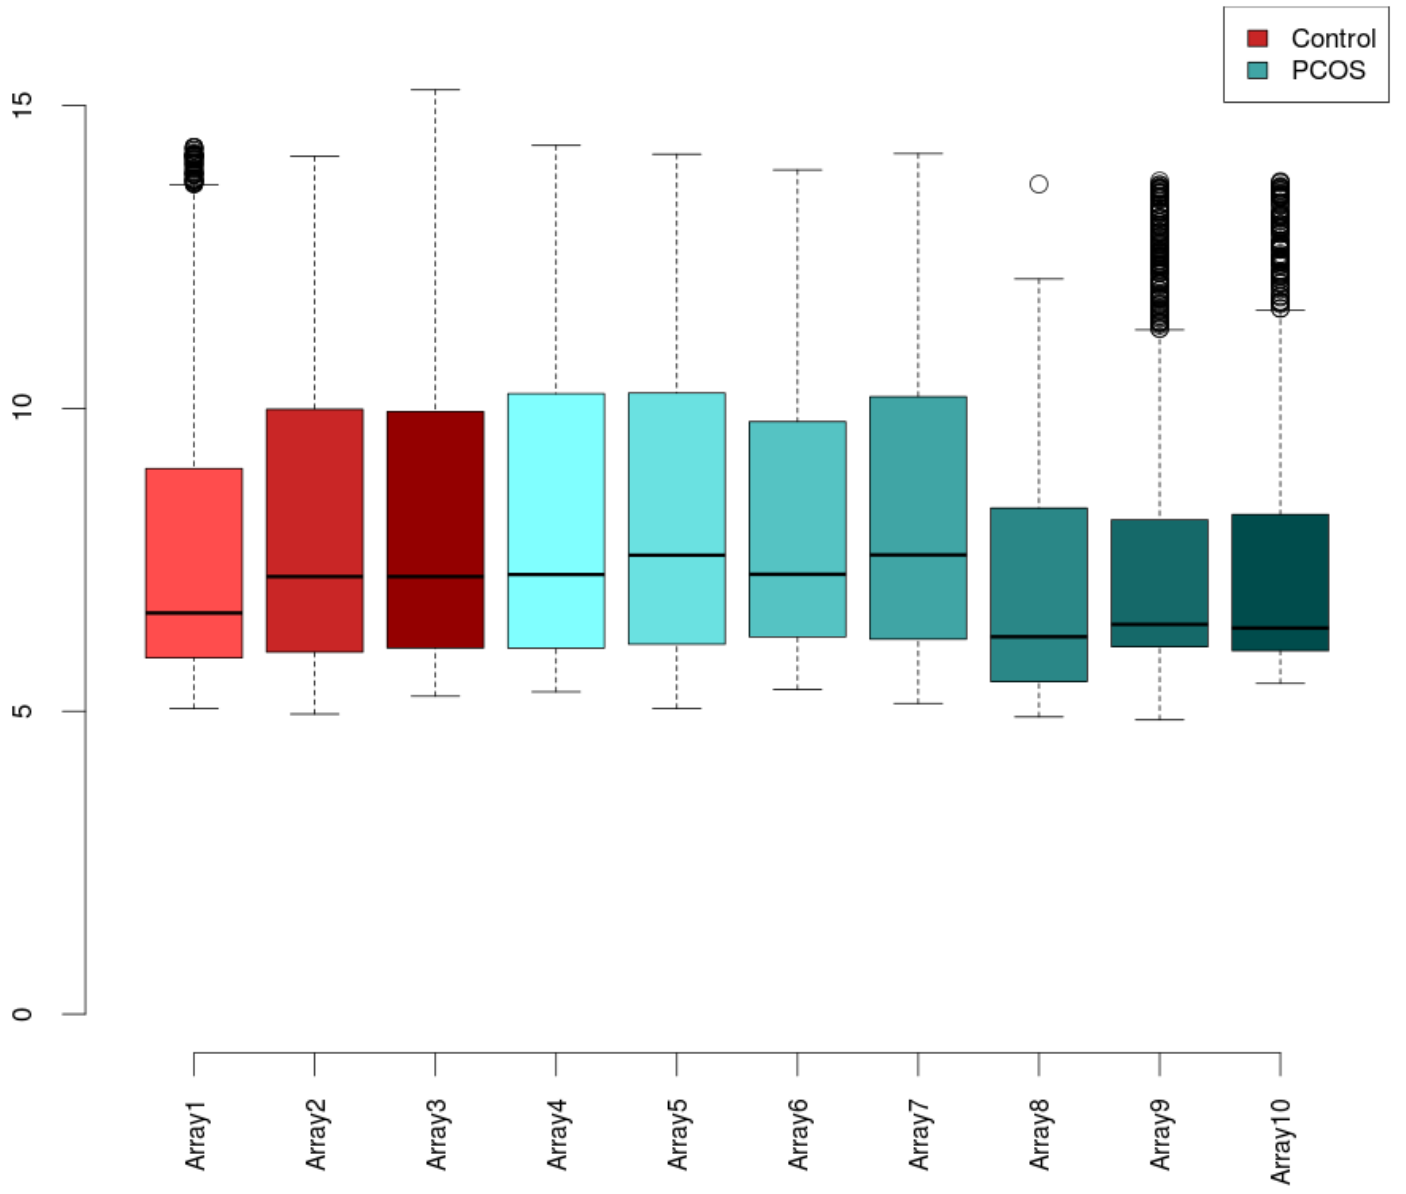

# Plot of Log scale factors

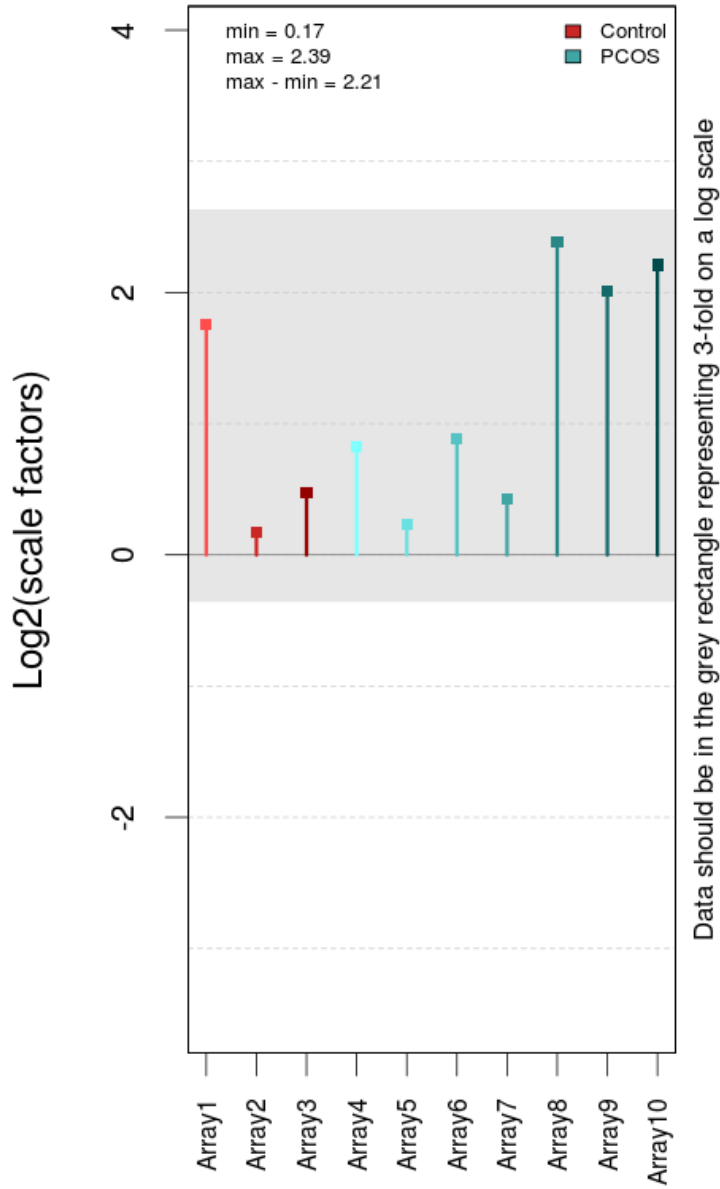

# Boxplot of scale factors (natural scale)

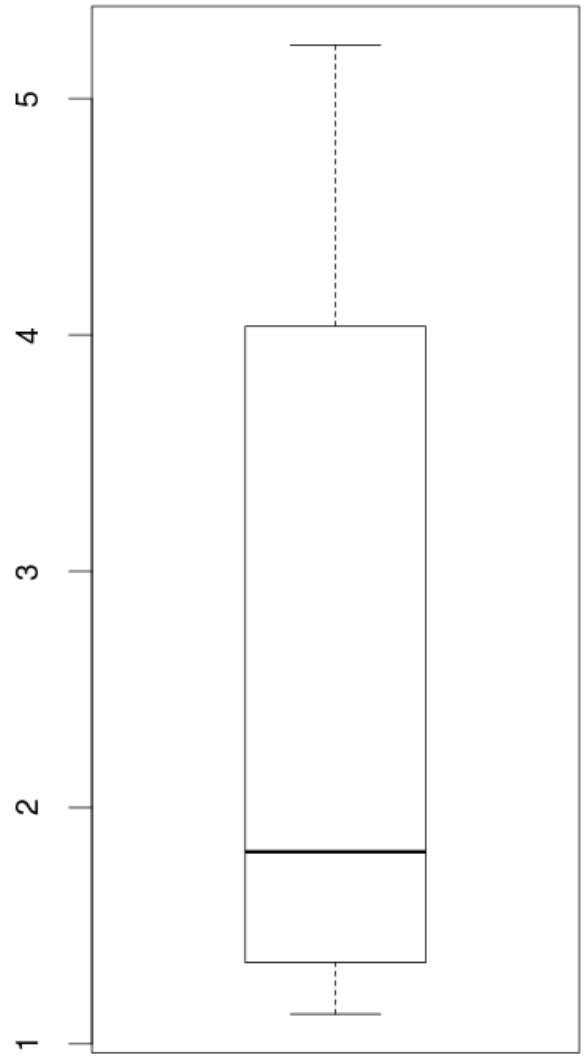

Scale factors QC: OK (spread < 3-fold)

# Boxplot of raw intensities

Distributions should be comparable between arrays

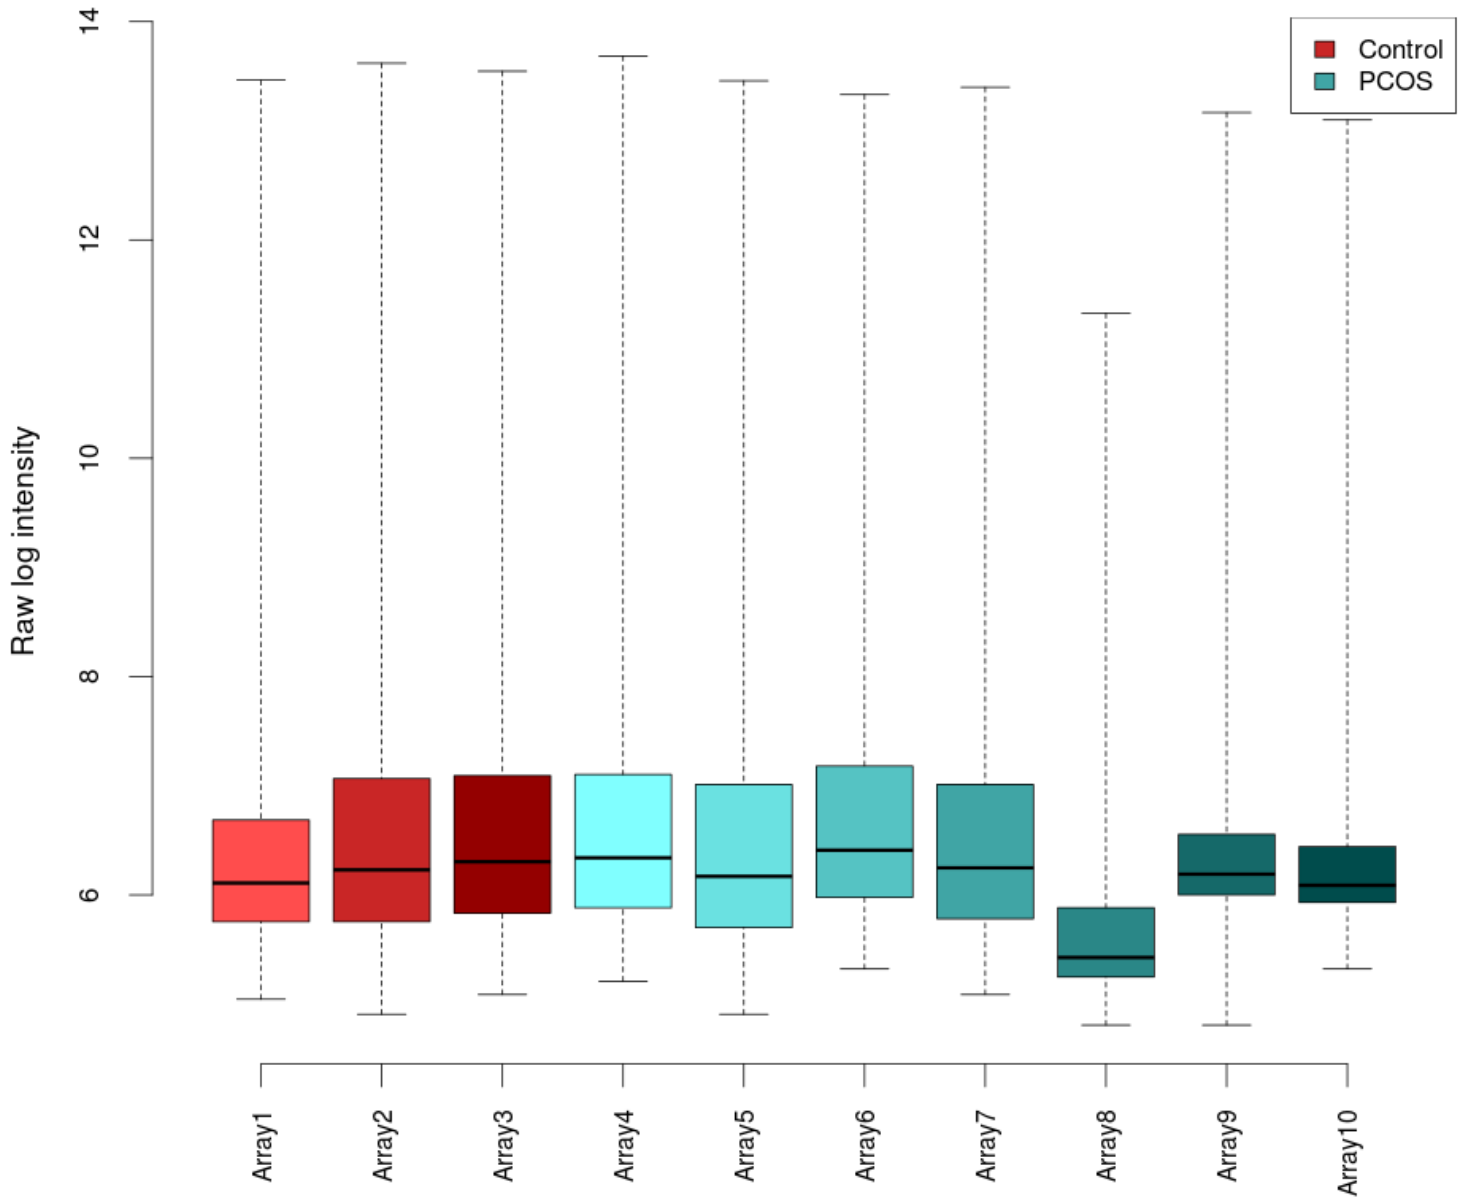

# Density histogram of raw intensities

Curves should be comparable between arrays

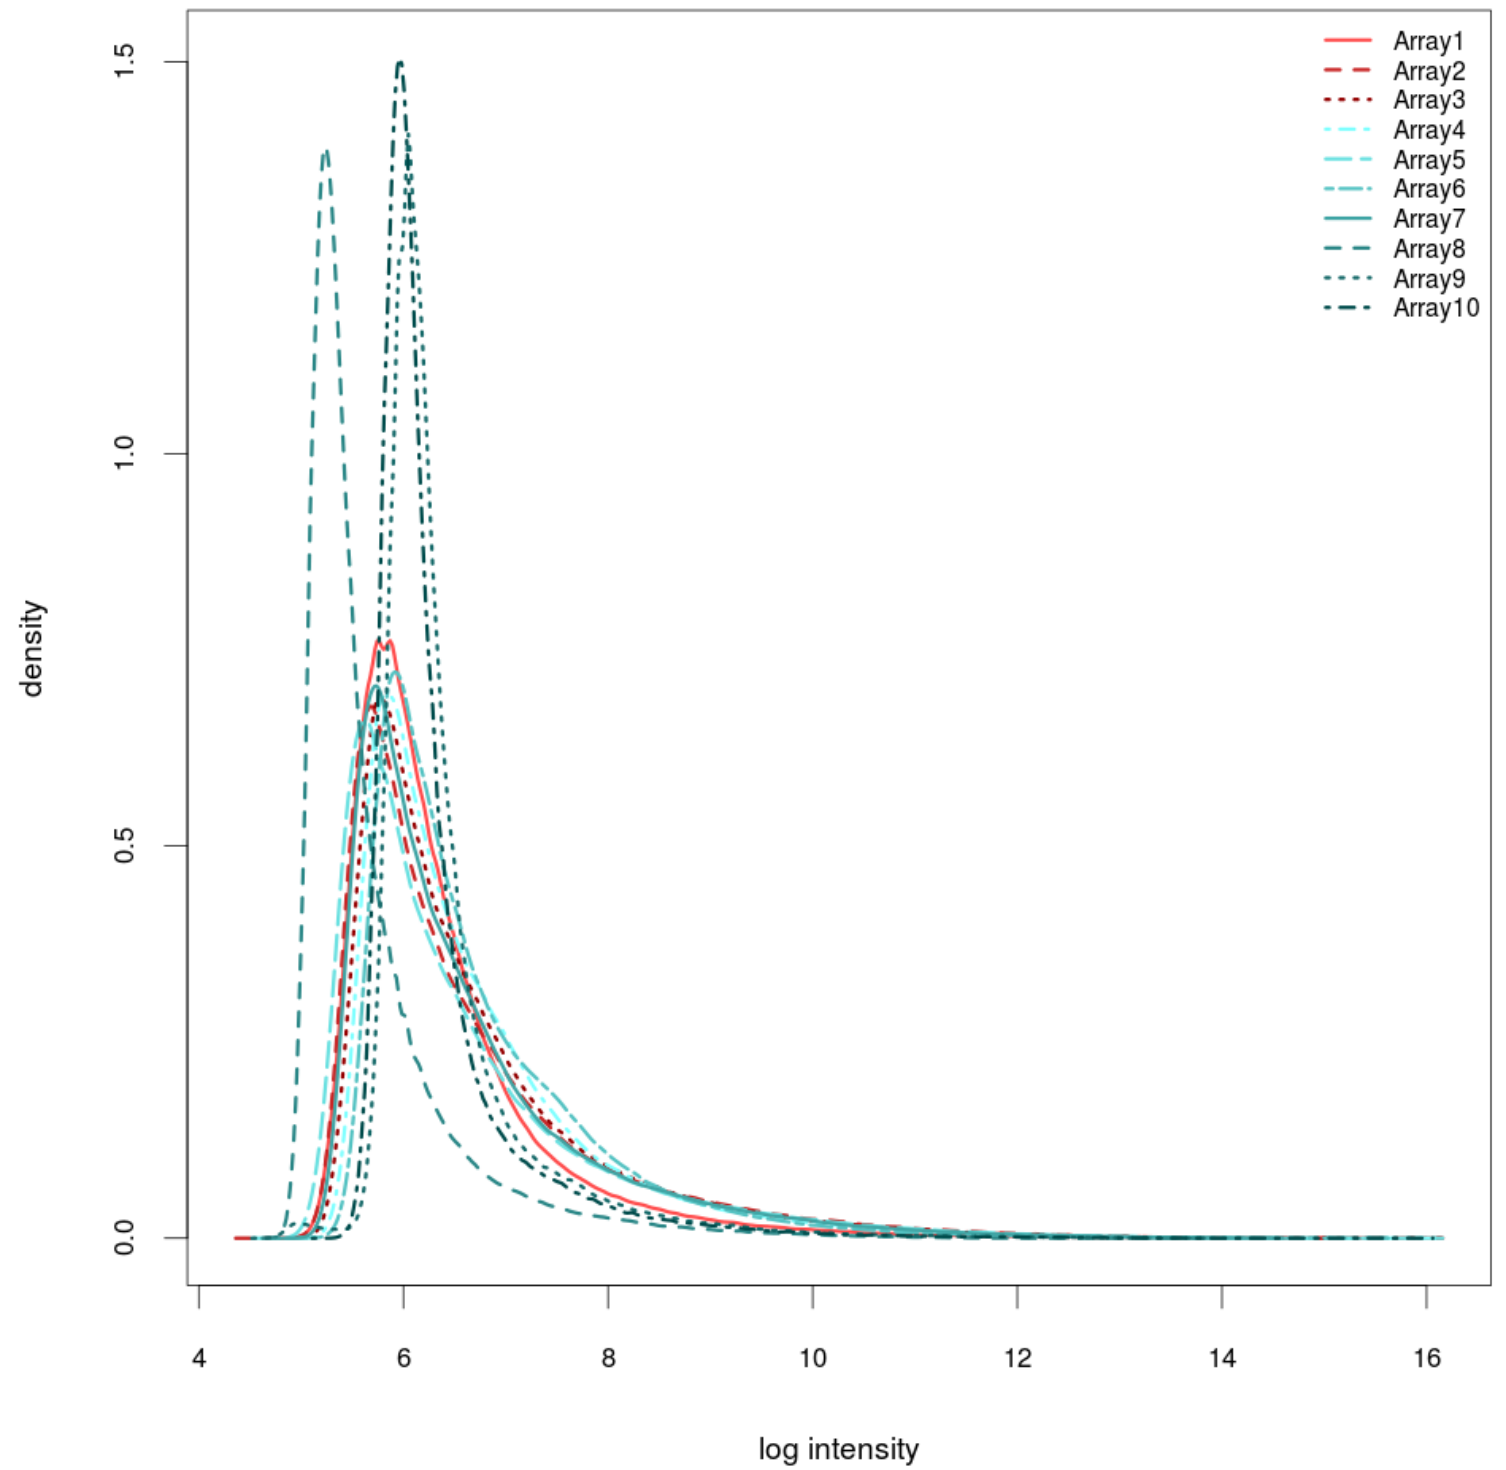

# MA plots of raw data 1 / 2

Array1 vs pseudo-median reference chip

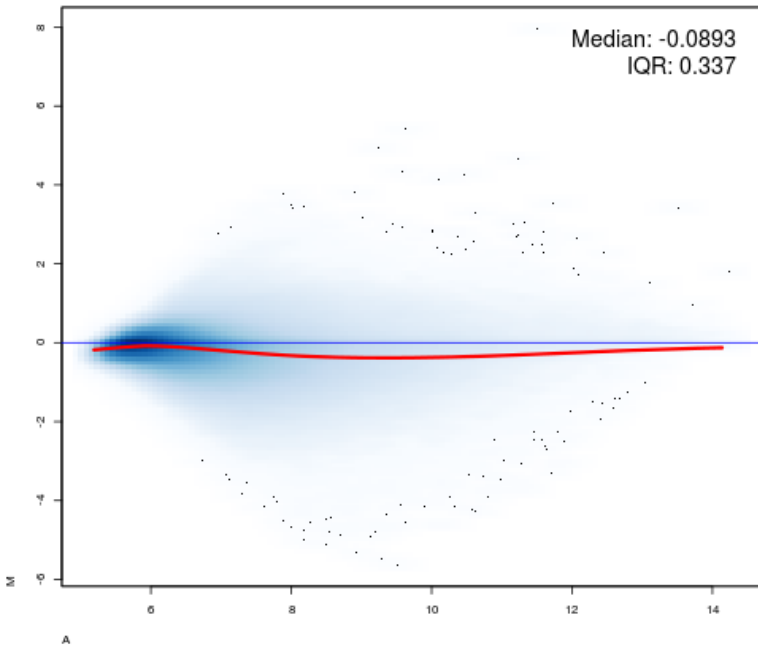

Array2 vs pseudo-median reference chip

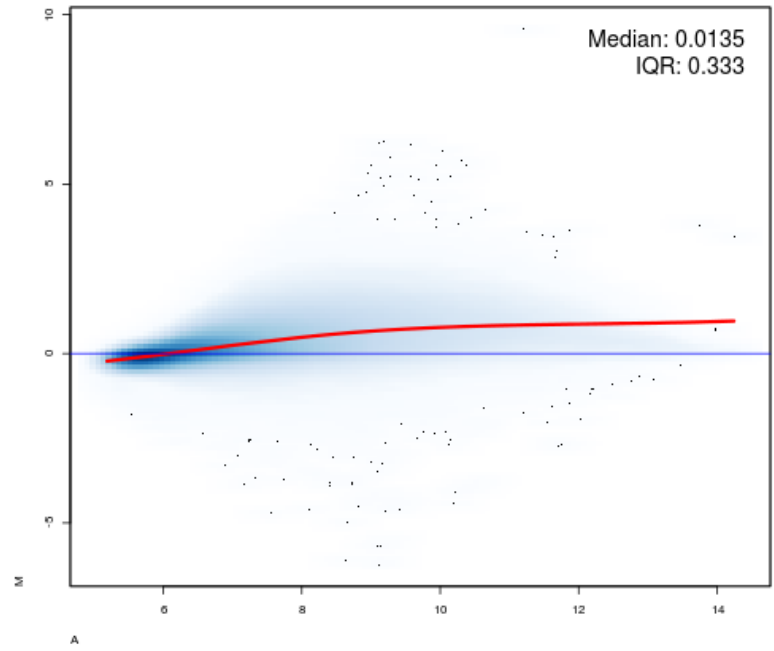

Array3 vs pseudo-median reference chip

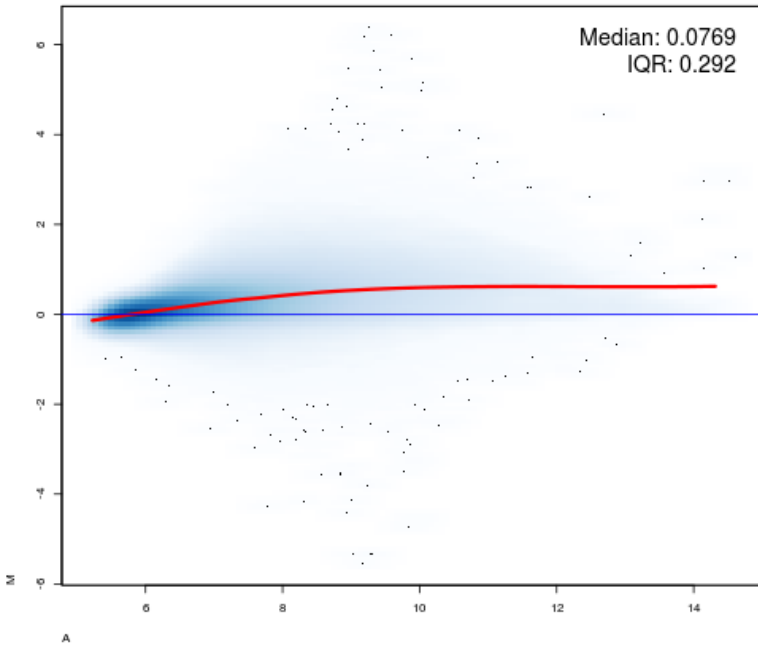

Array4 vs pseudo-median reference chip

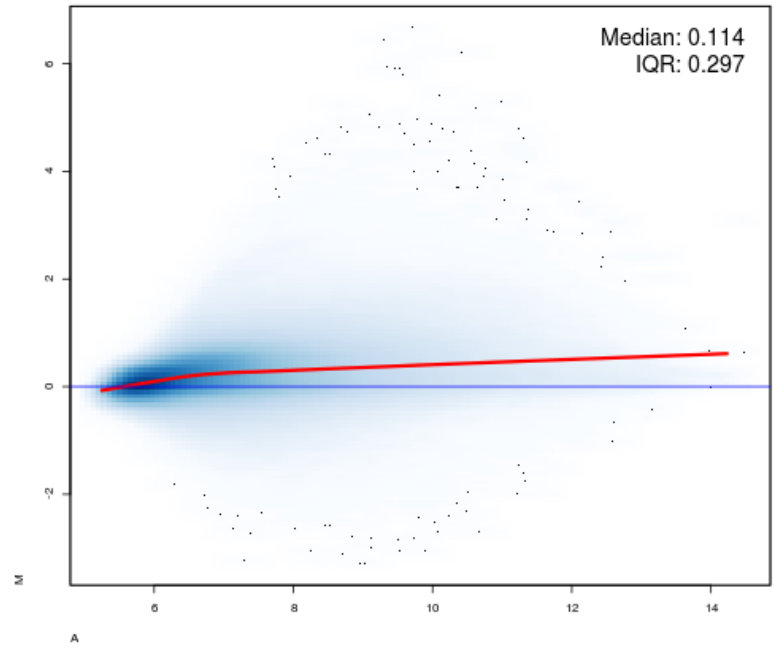

Array5 vs pseudo-median reference chip

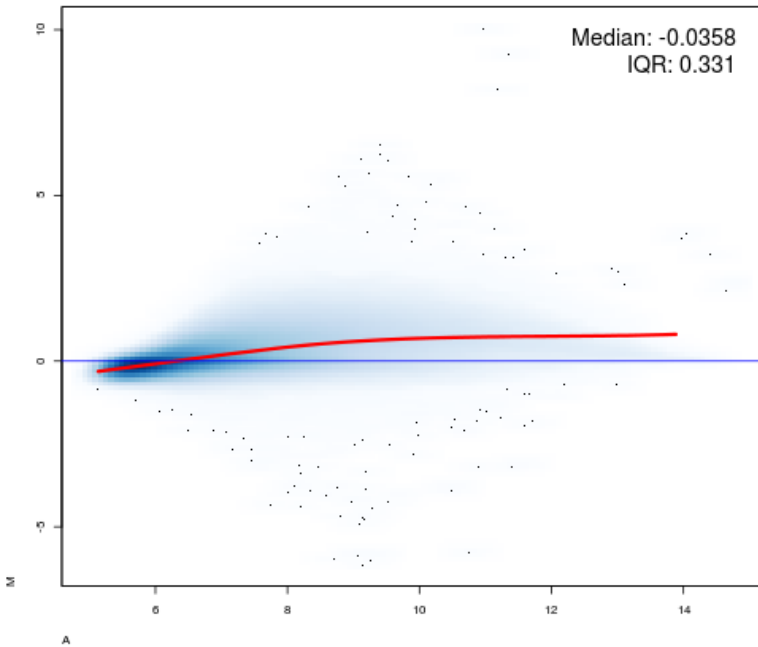

Array6 vs pseudo-median reference chip

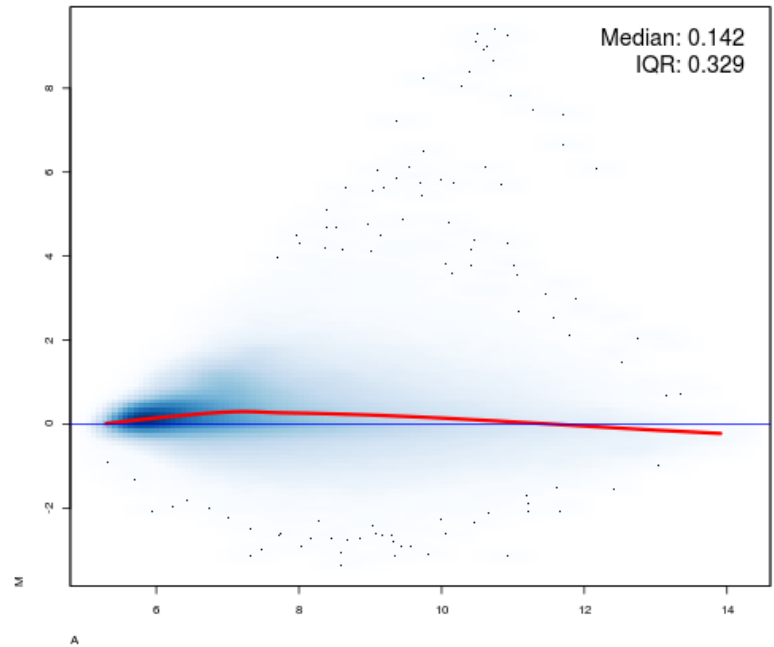

# MA plots of raw data 2 / 2

### Array7 vs pseudo-median reference chip

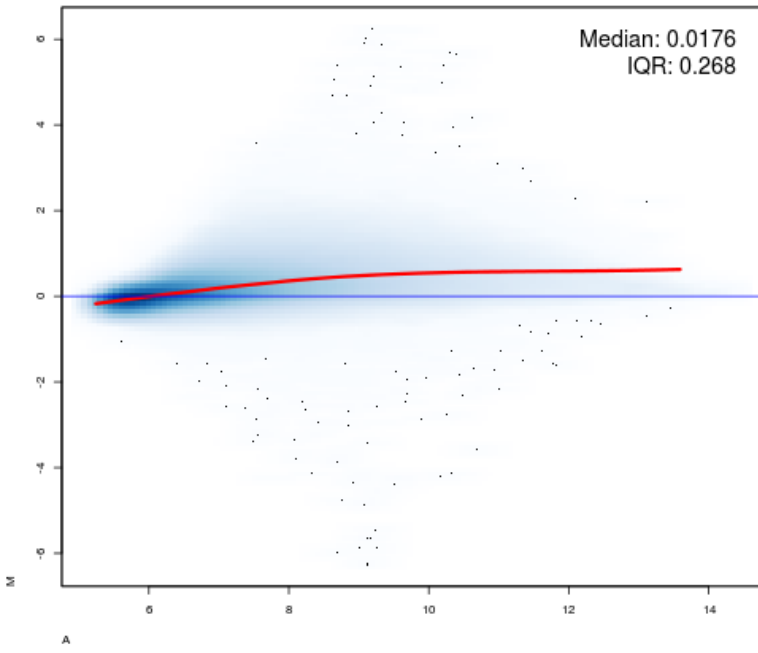

### Array8 vs pseudo-median reference chip

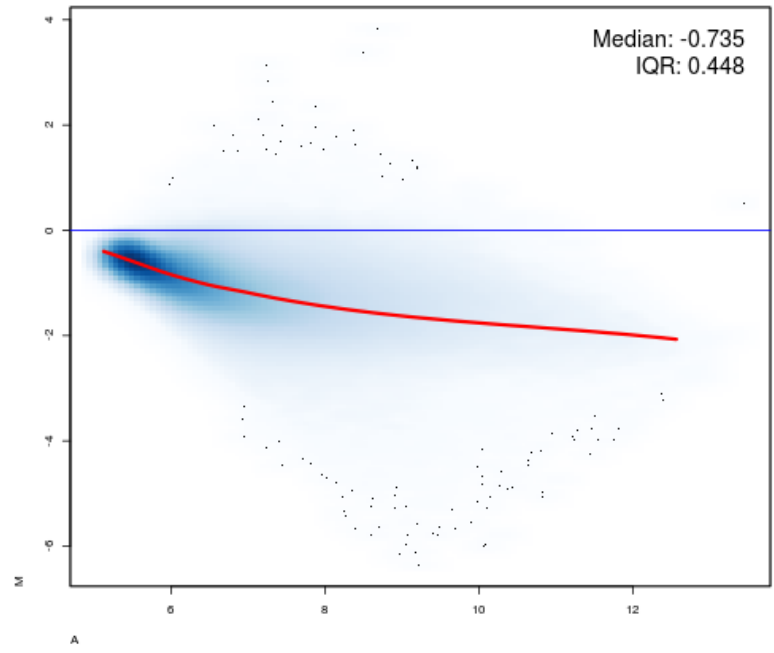

### Array9 vs pseudo-median reference chip

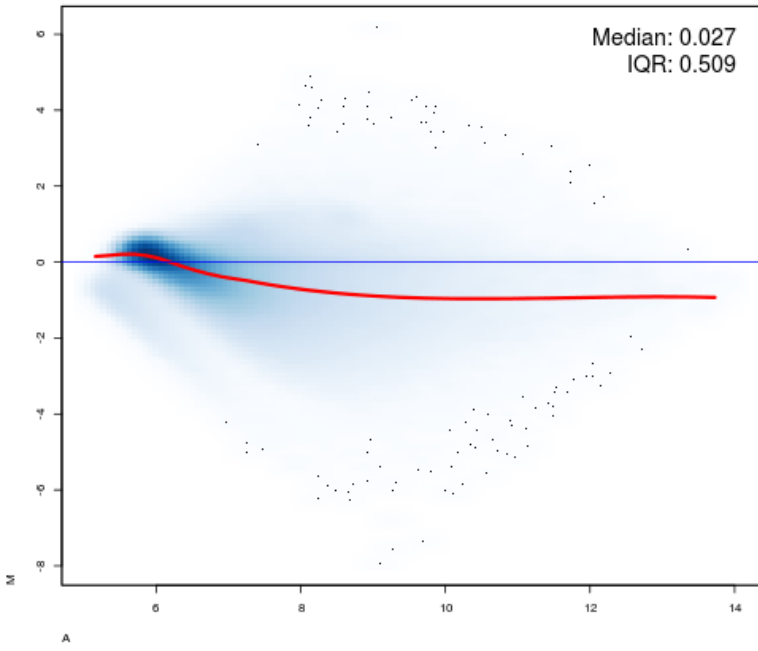

### Array10 vs pseudo-median reference chip

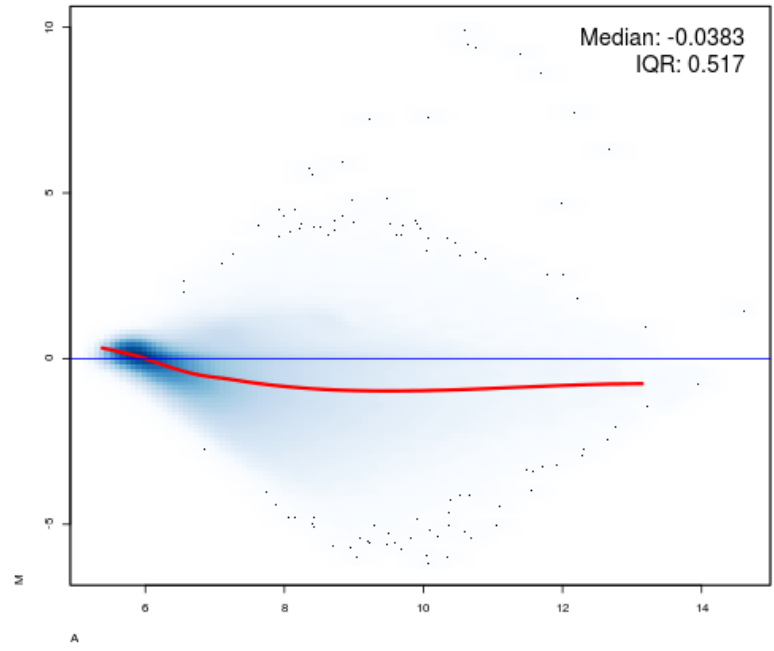



# 2D virtual PLM image for model characteristic: resid 1 / 2

Array1

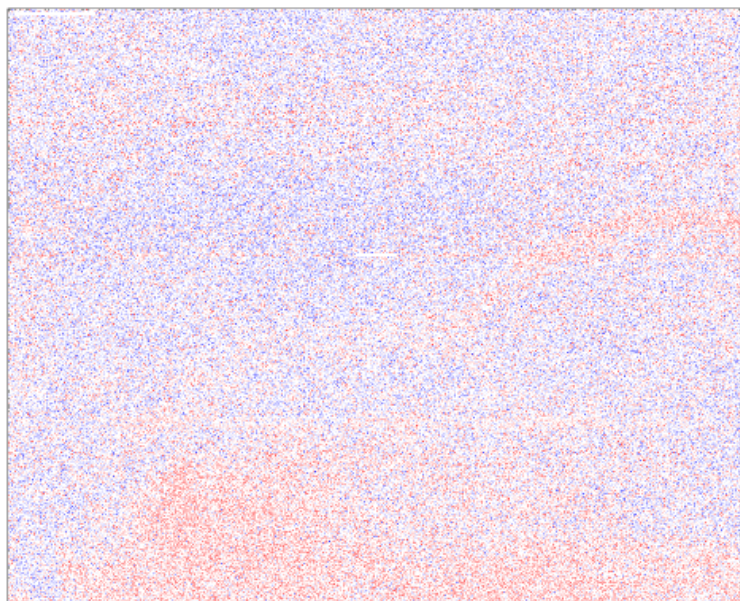

Array2

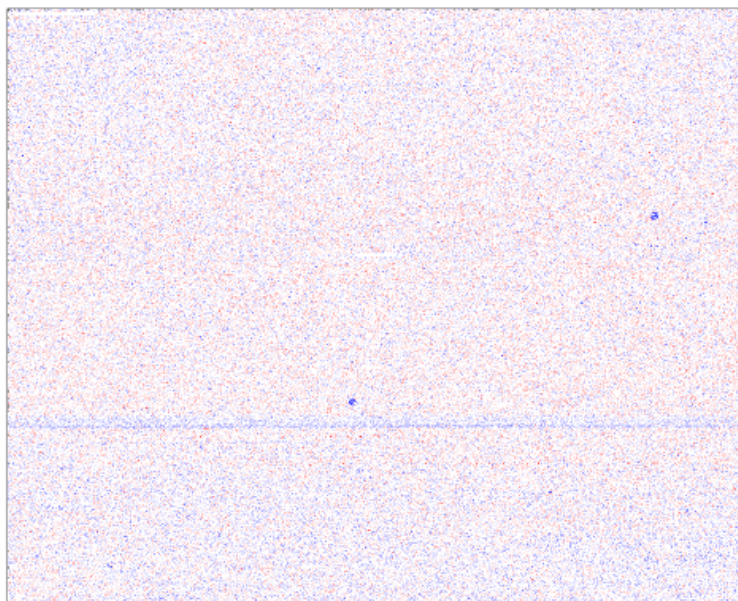

Array3

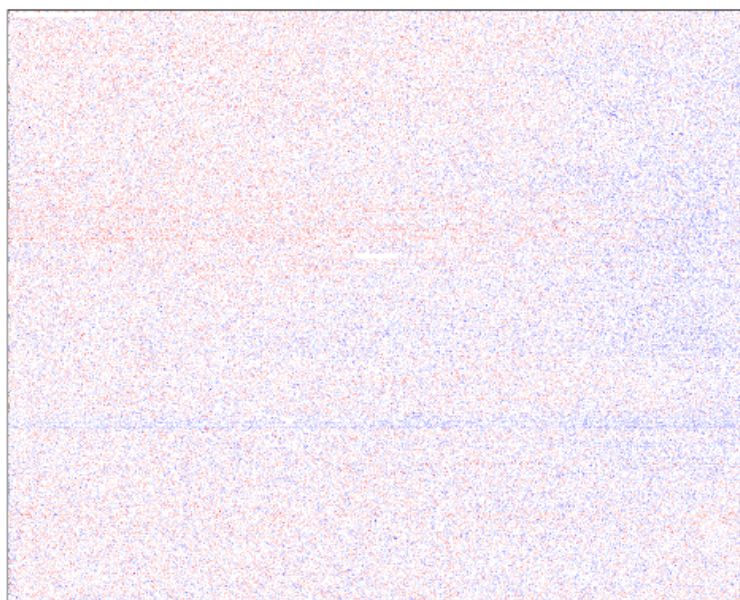

Array4

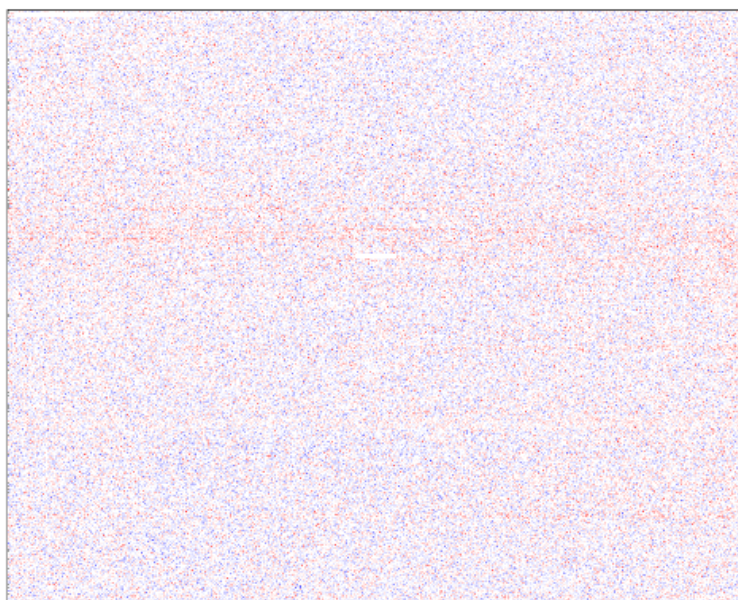

Array5

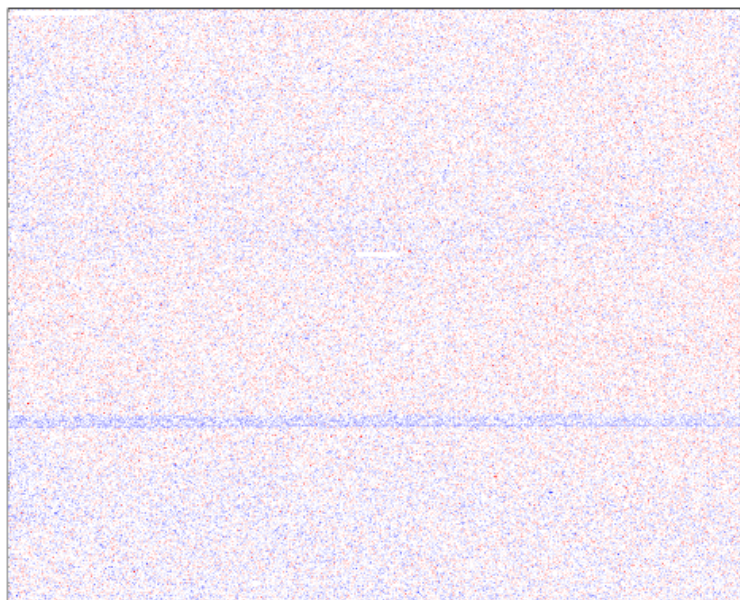

Array6

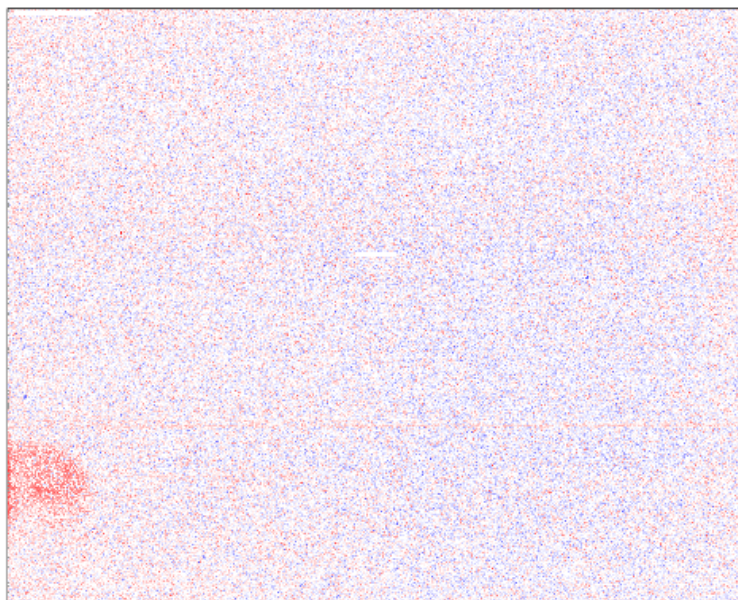

# 2D virtual PLM image for model characteristic: resids 2 / 2

Array7

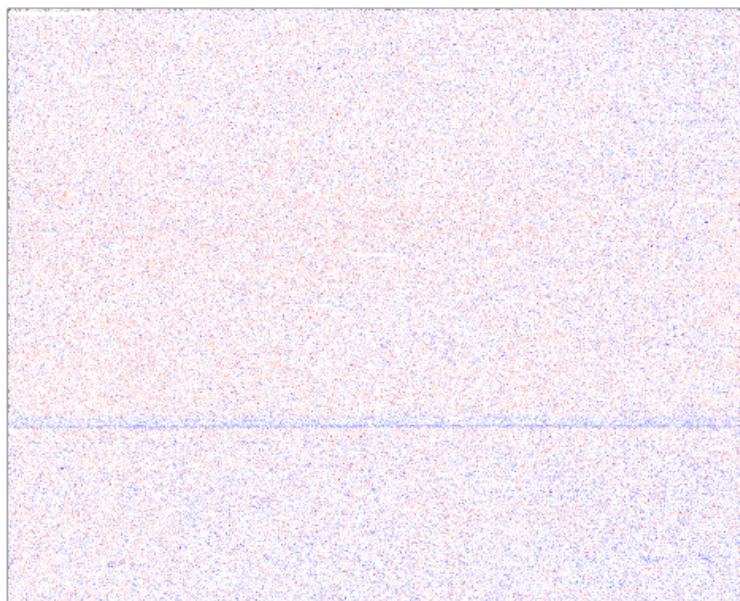

Array8

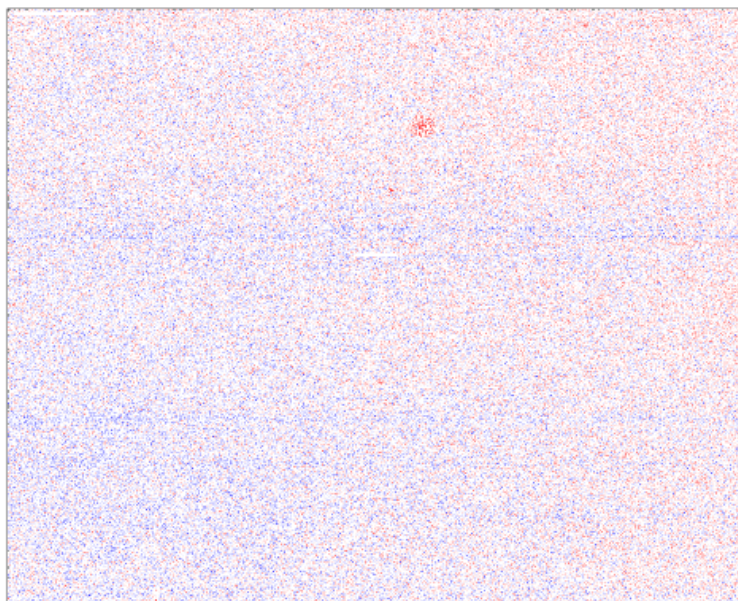

Array9

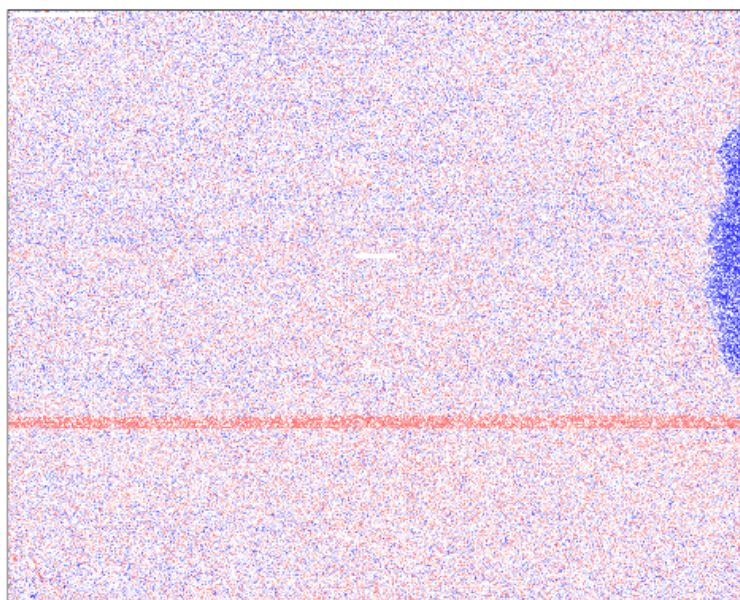

Array10

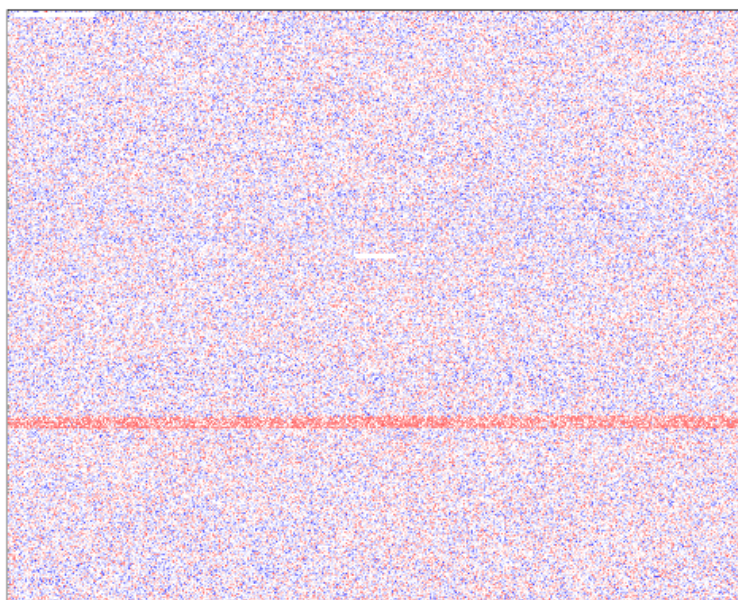

# Normalized Unscaled Standard Errors (NUSE)

NUSE median value should be < 1.1

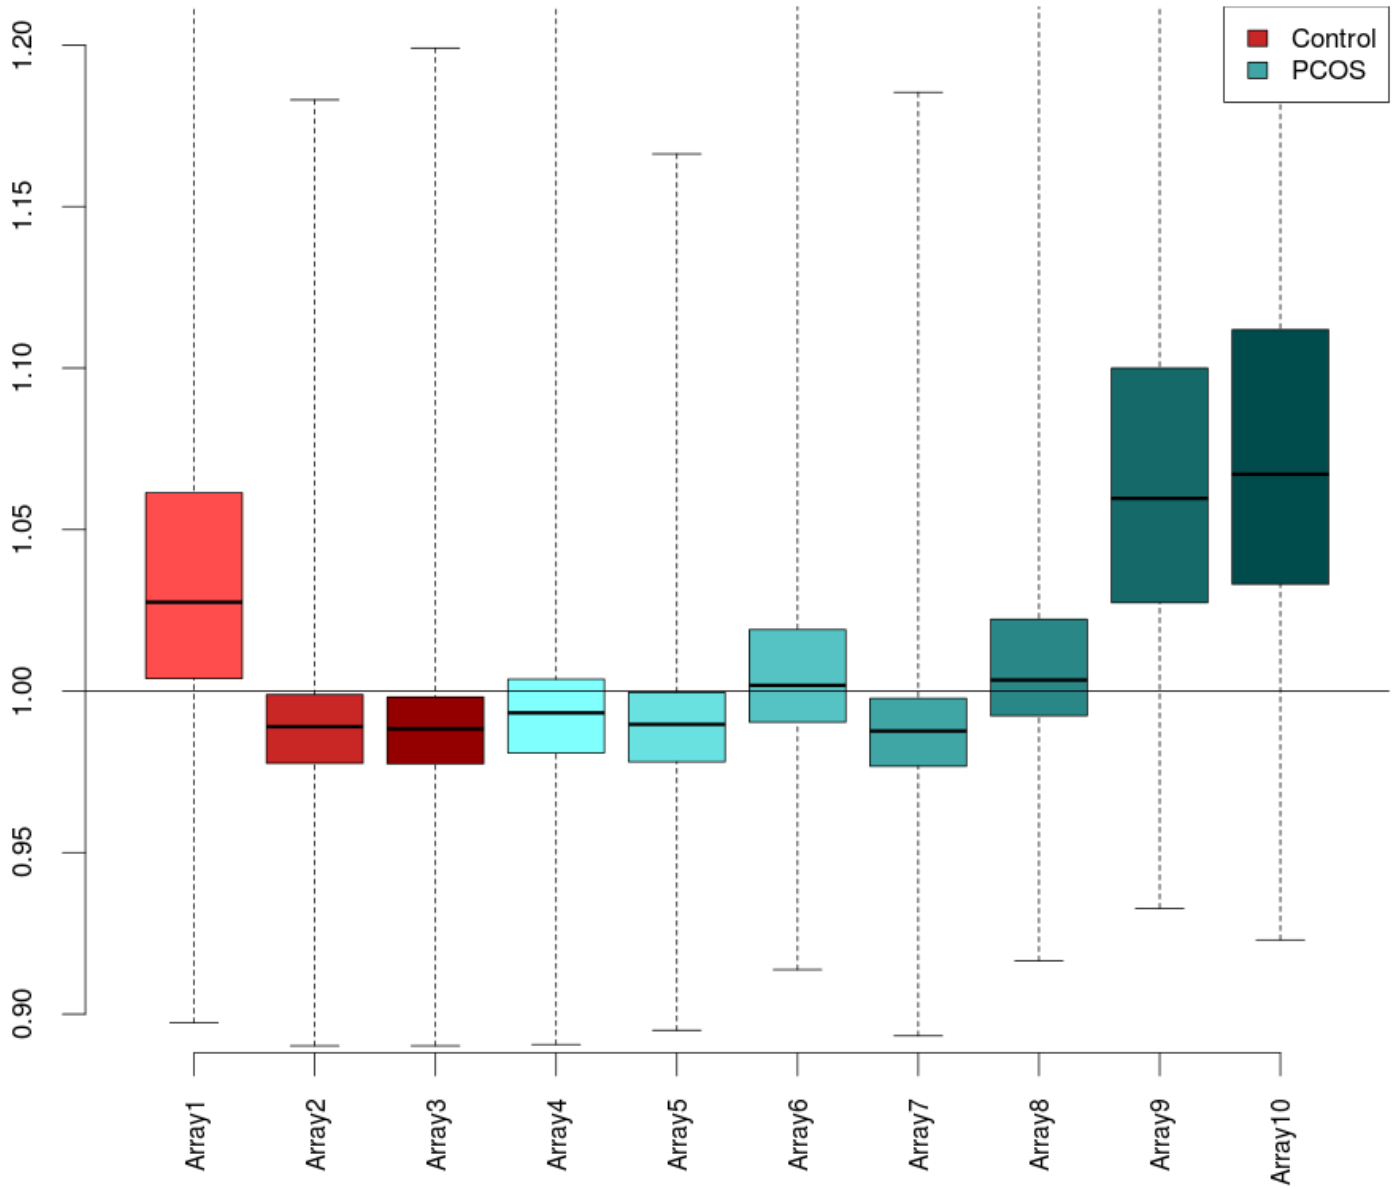

# Relative Log Expression (RLE)

RLE distributions should be centered around 0

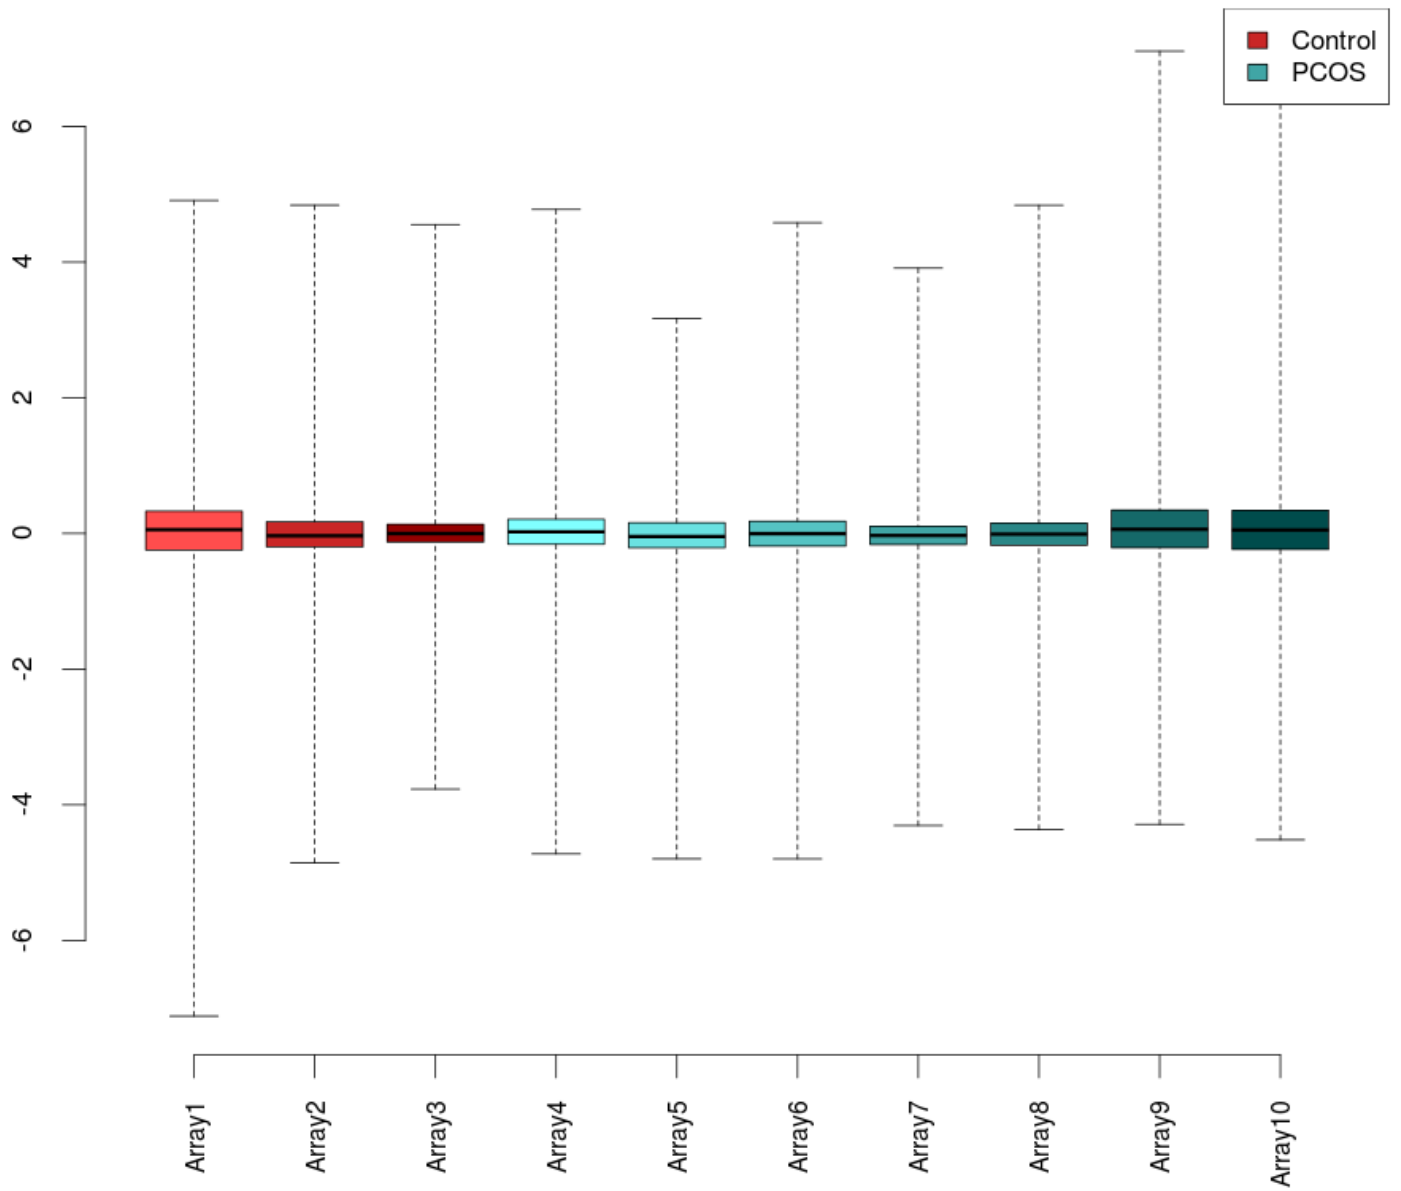



# PCA analysis of Raw data

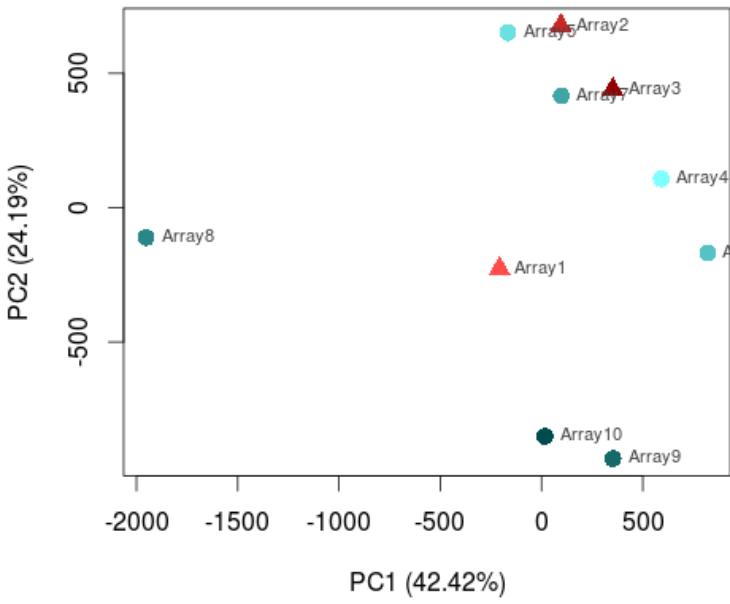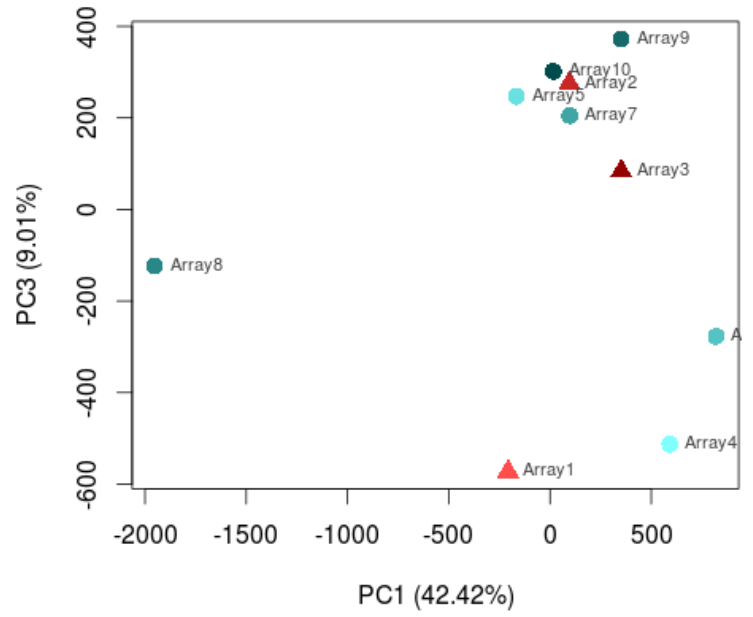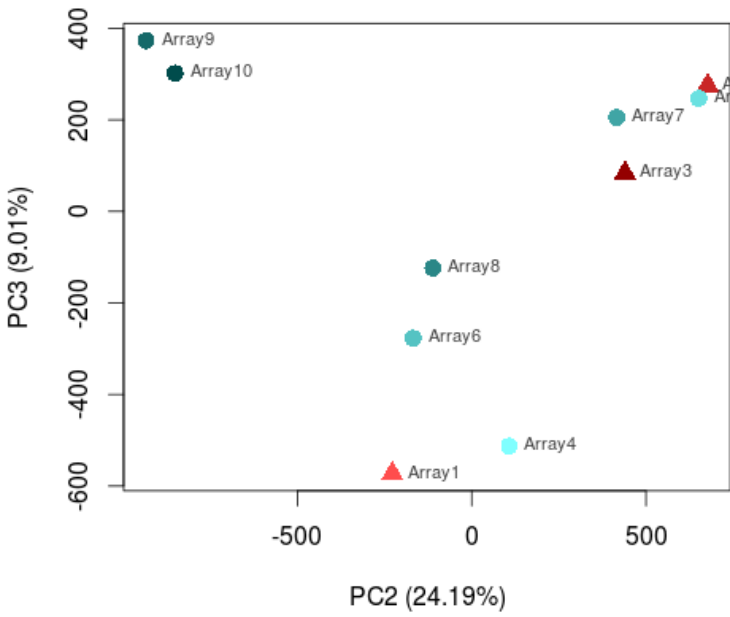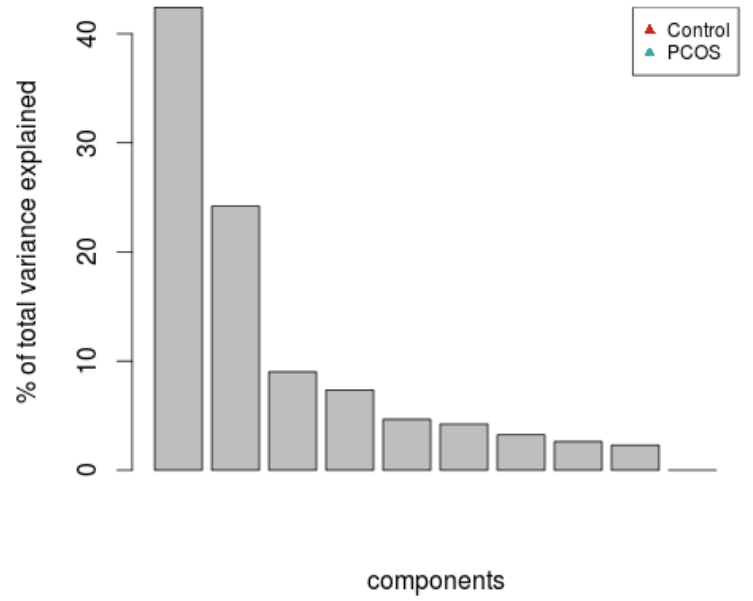

# Cluster dendrogram of raw data

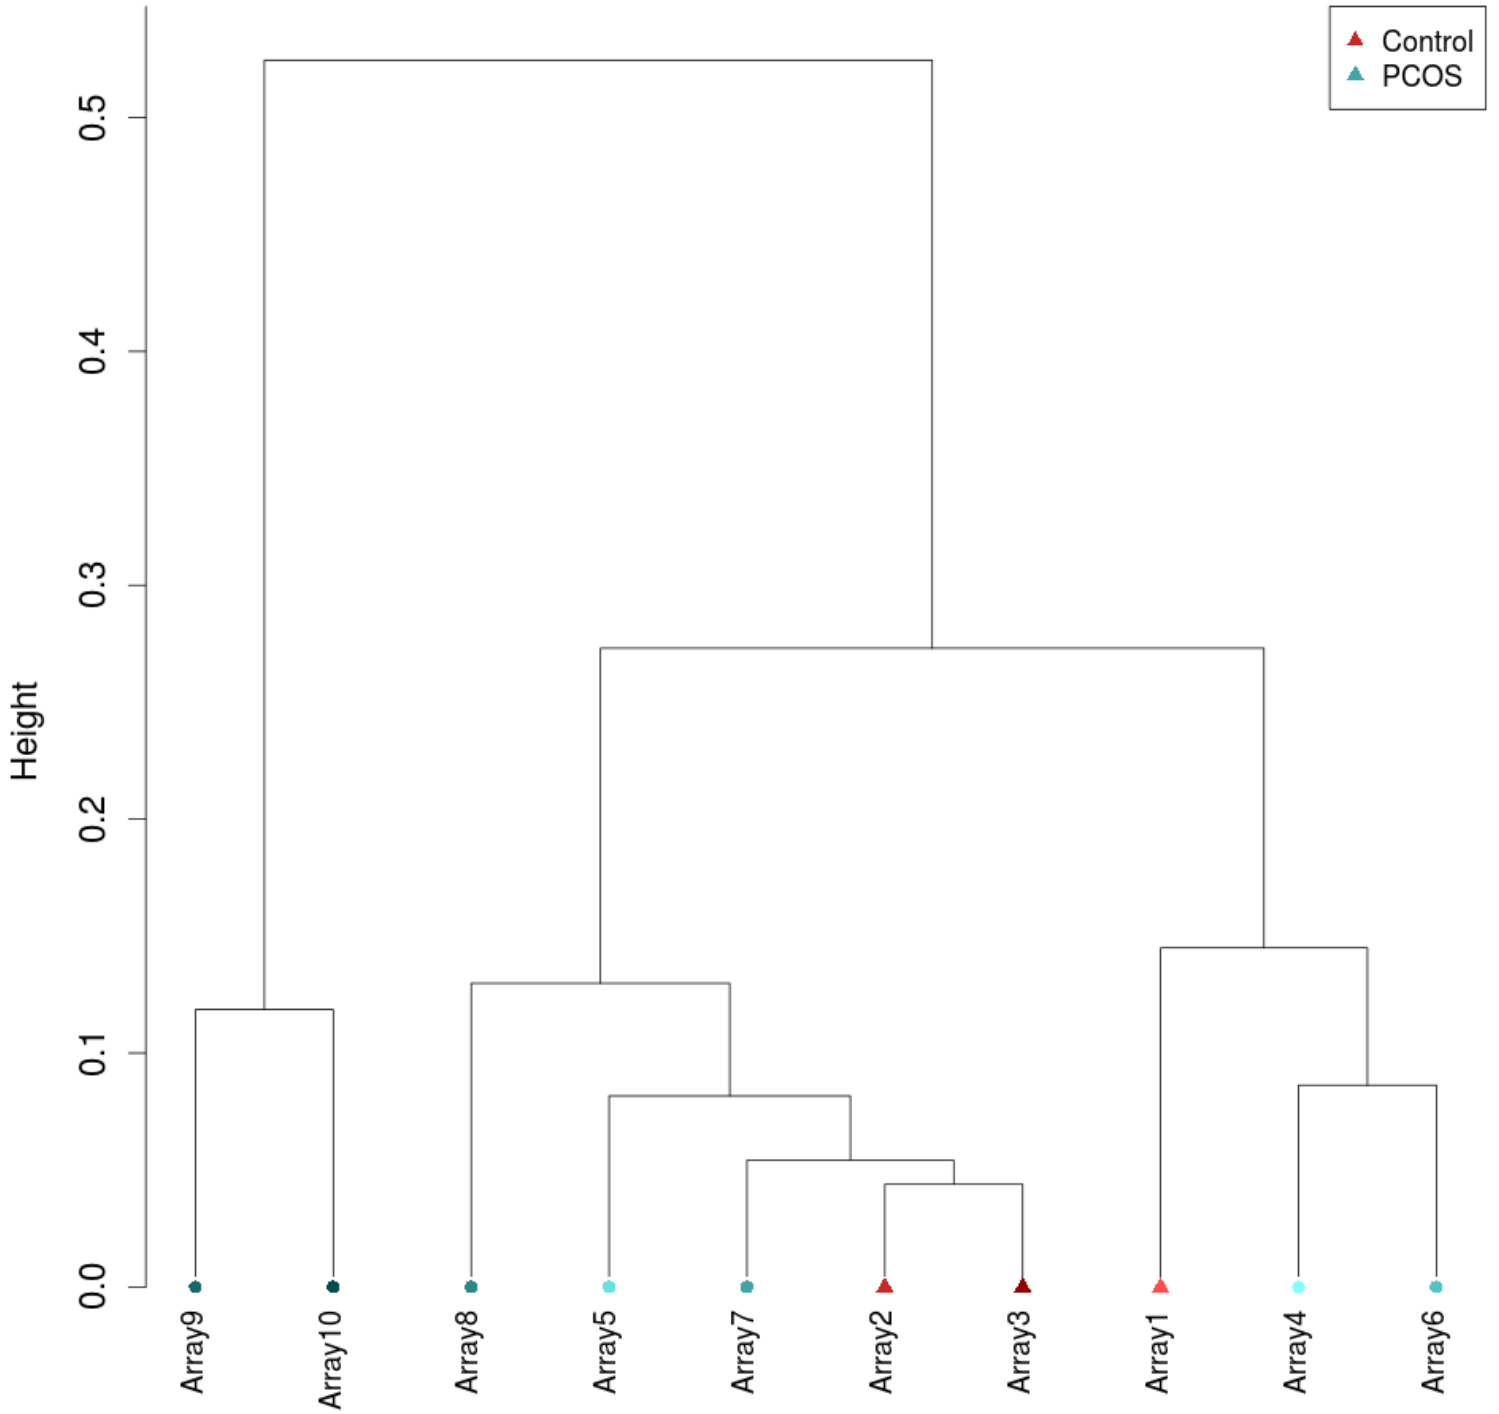

distance: Pearson  
cluster method: ward

## Pre-processing of Raw Data

Method: GCRMA

Annotation: hgu133plus2\_Hs\_ENSG



# Boxplot after GCRMA

Distributions should be comparable between arrays

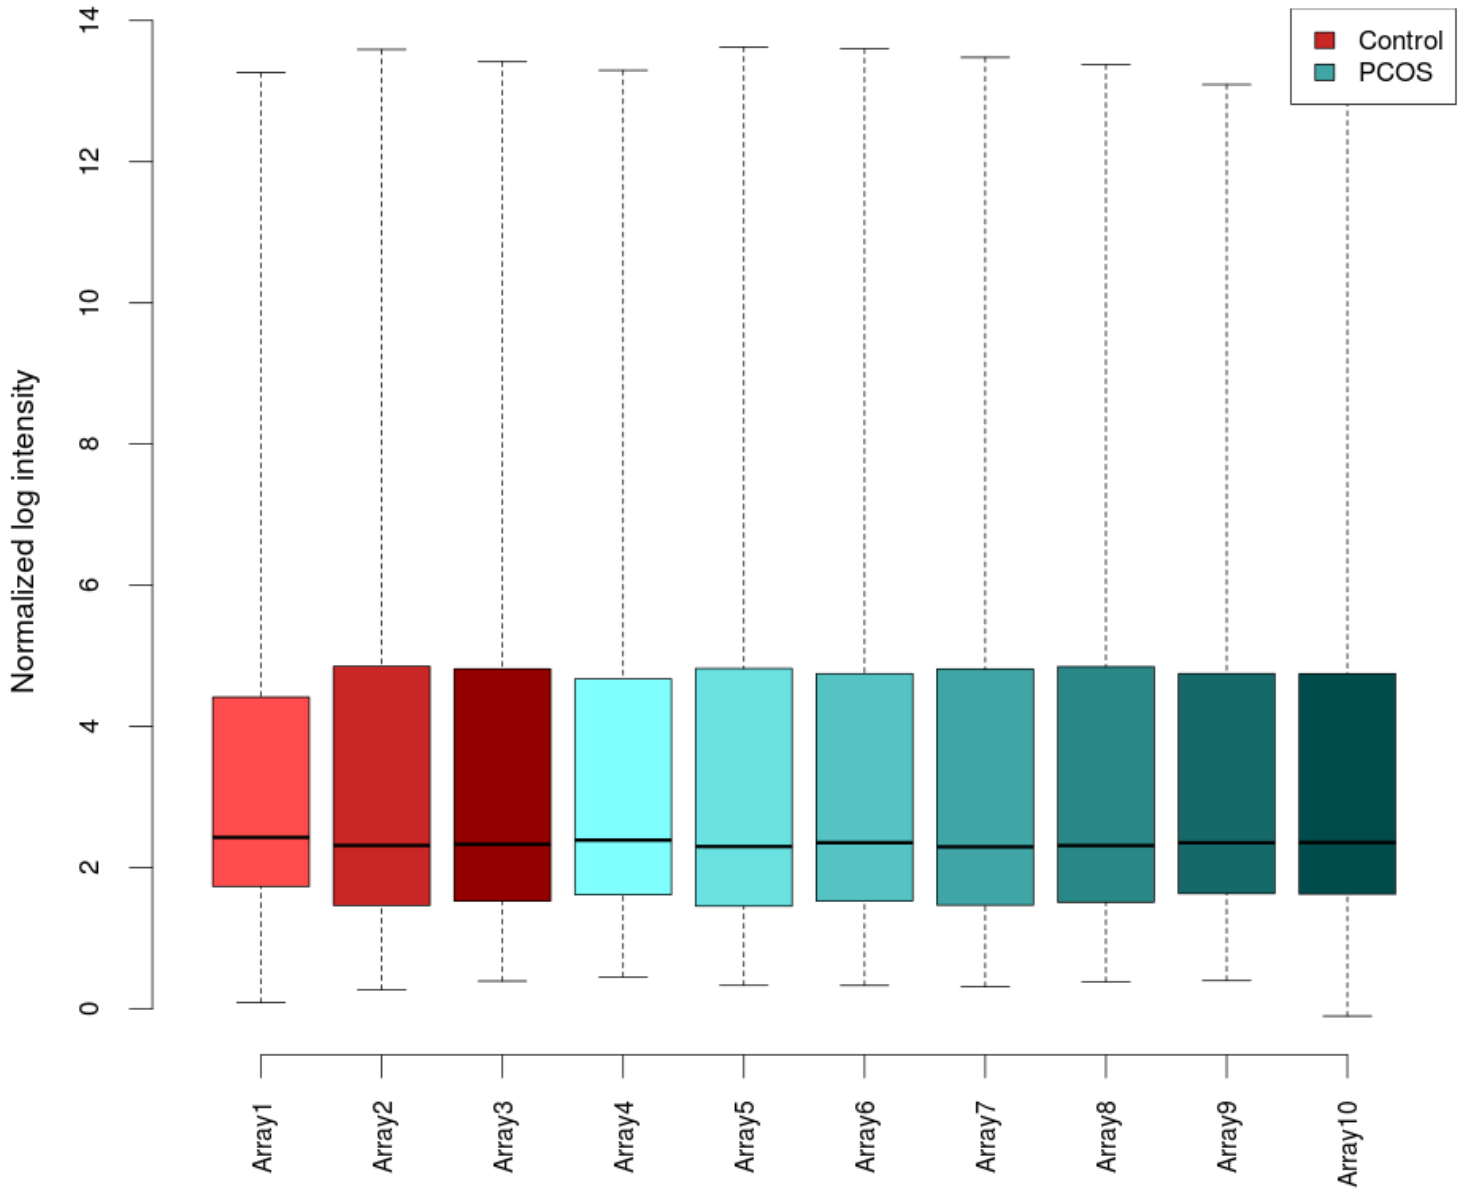



# MA plots after GCRMA normalization 1 / 2

Array1 vs pseudo-median reference chip

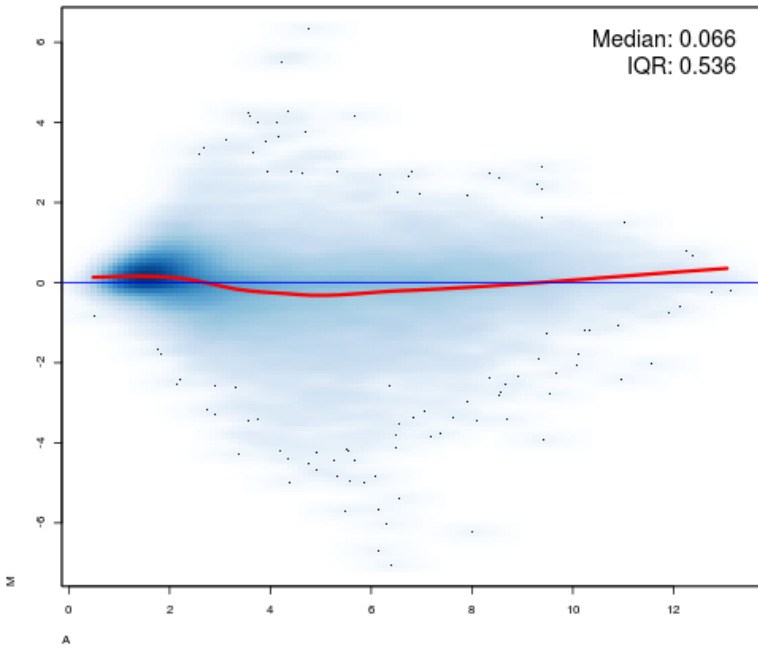

Array2 vs pseudo-median reference chip

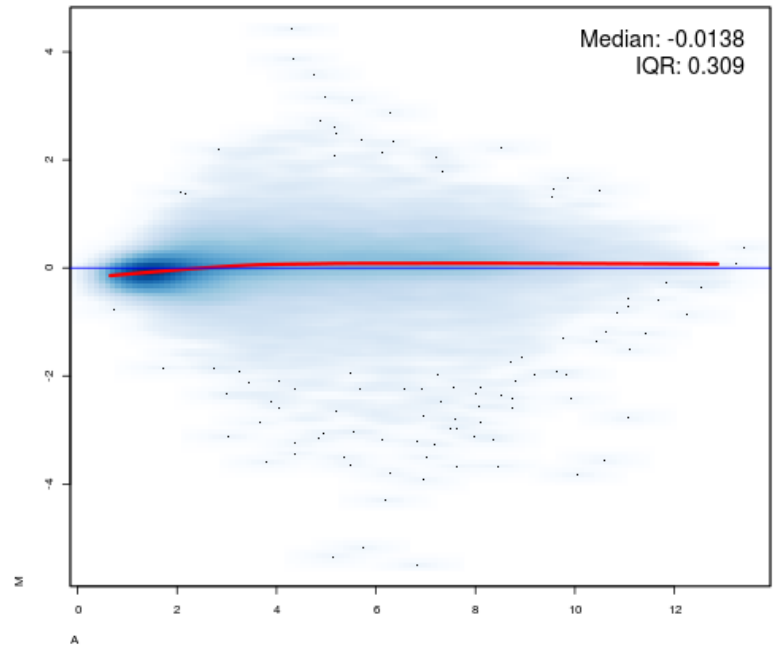

Array3 vs pseudo-median reference chip

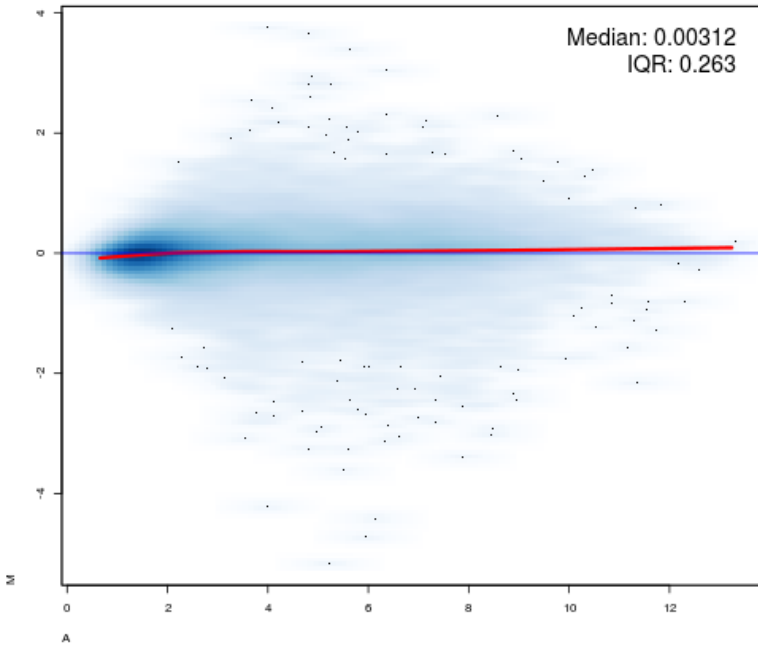

Array4 vs pseudo-median reference chip

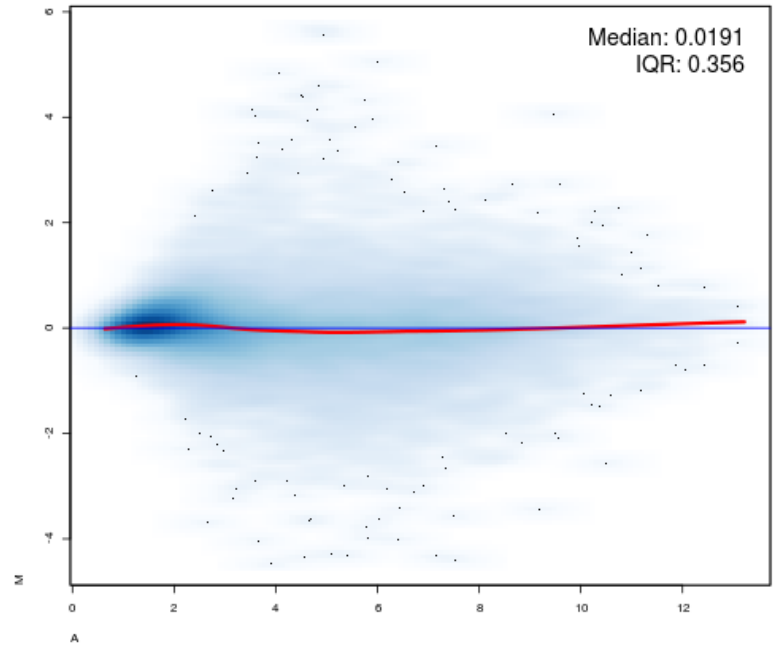

Array5 vs pseudo-median reference chip

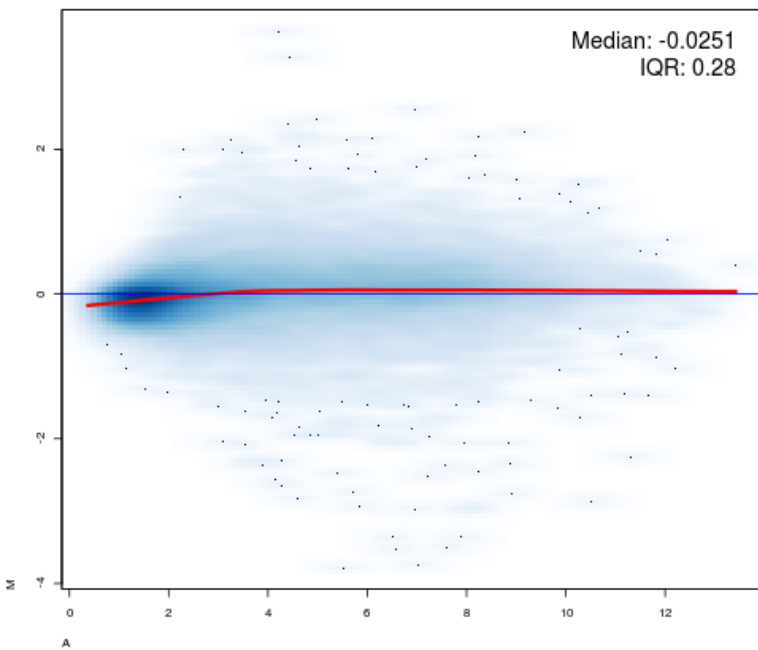

Array6 vs pseudo-median reference chip

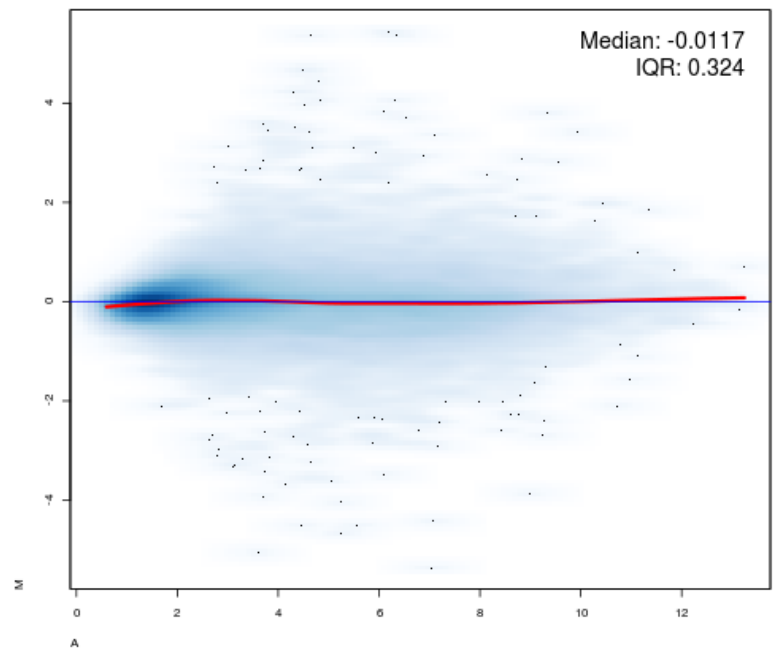

# MA plots after GCRMA normalization 2 / 2

Array7 vs pseudo-median reference chip

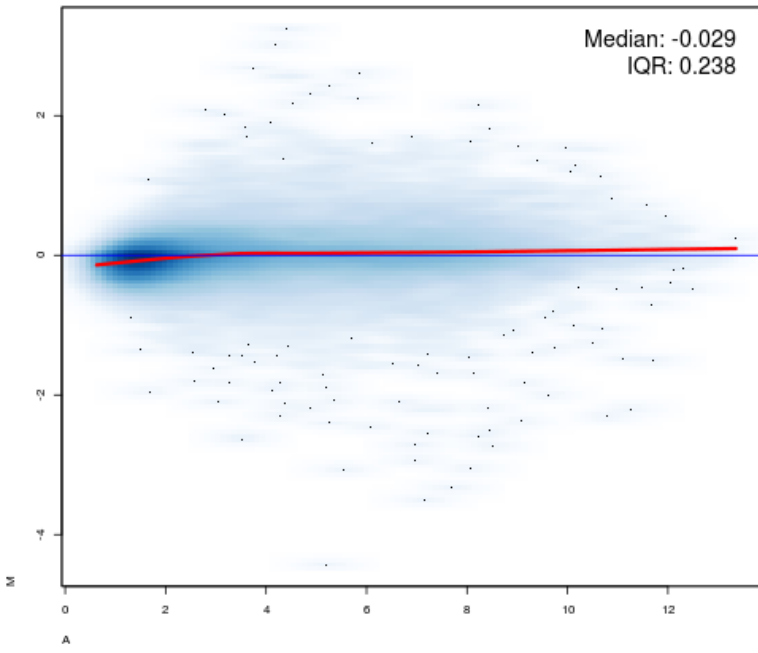

Array8 vs pseudo-median reference chip

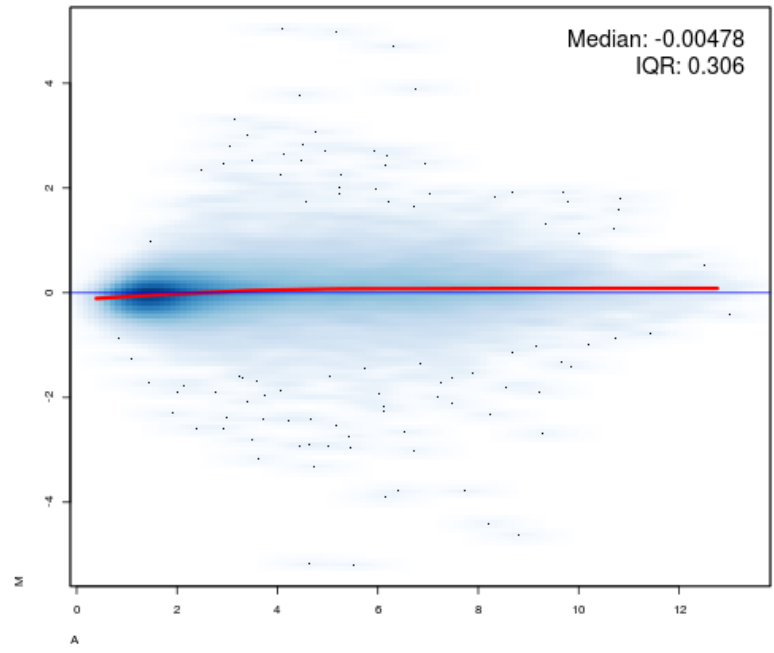

Array9 vs pseudo-median reference chip

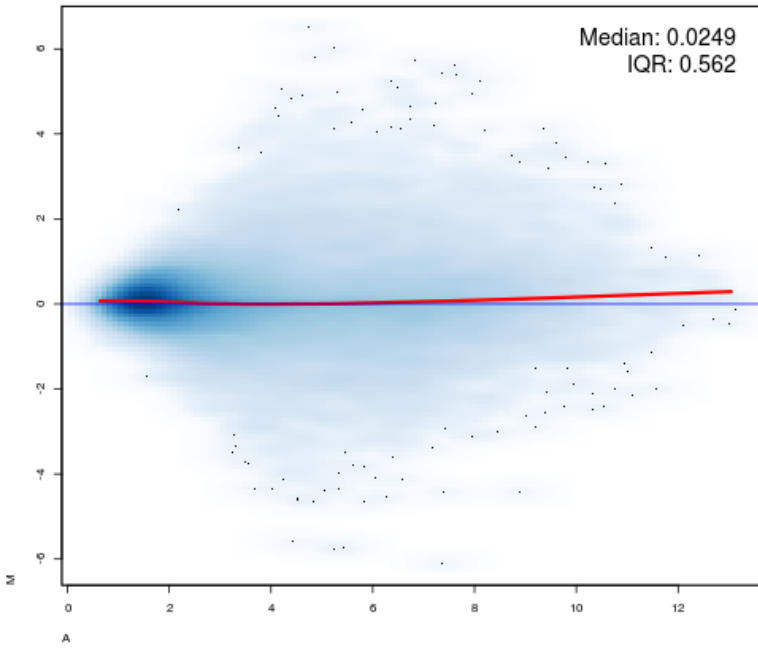

Array10 vs pseudo-median reference chip

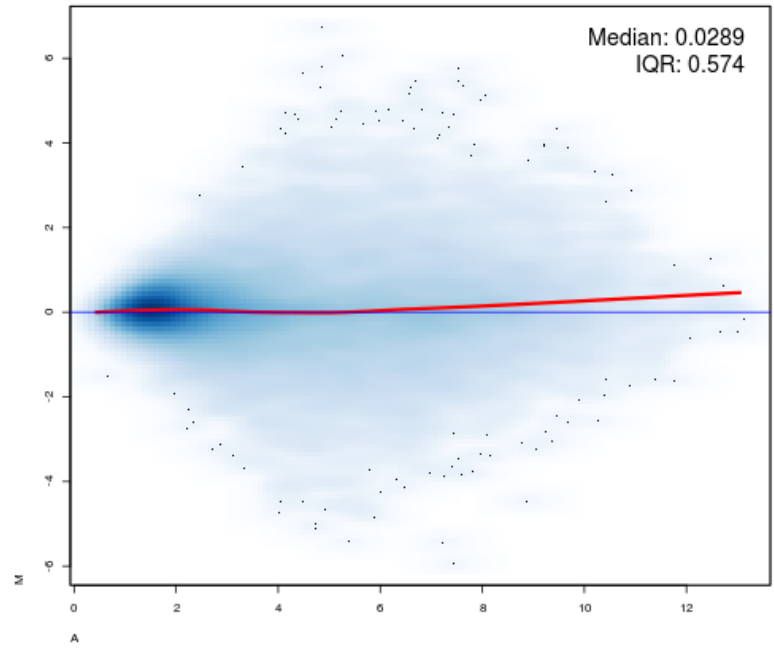

Color Key  
and Density Plot

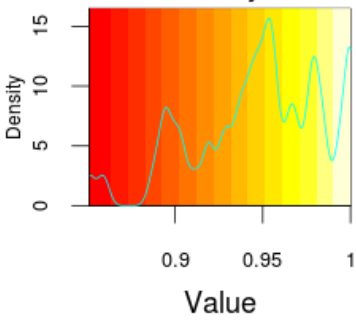

Array correlation plot  
after GCRMA normalization  
correlation method: pearson  
cluster method: ward

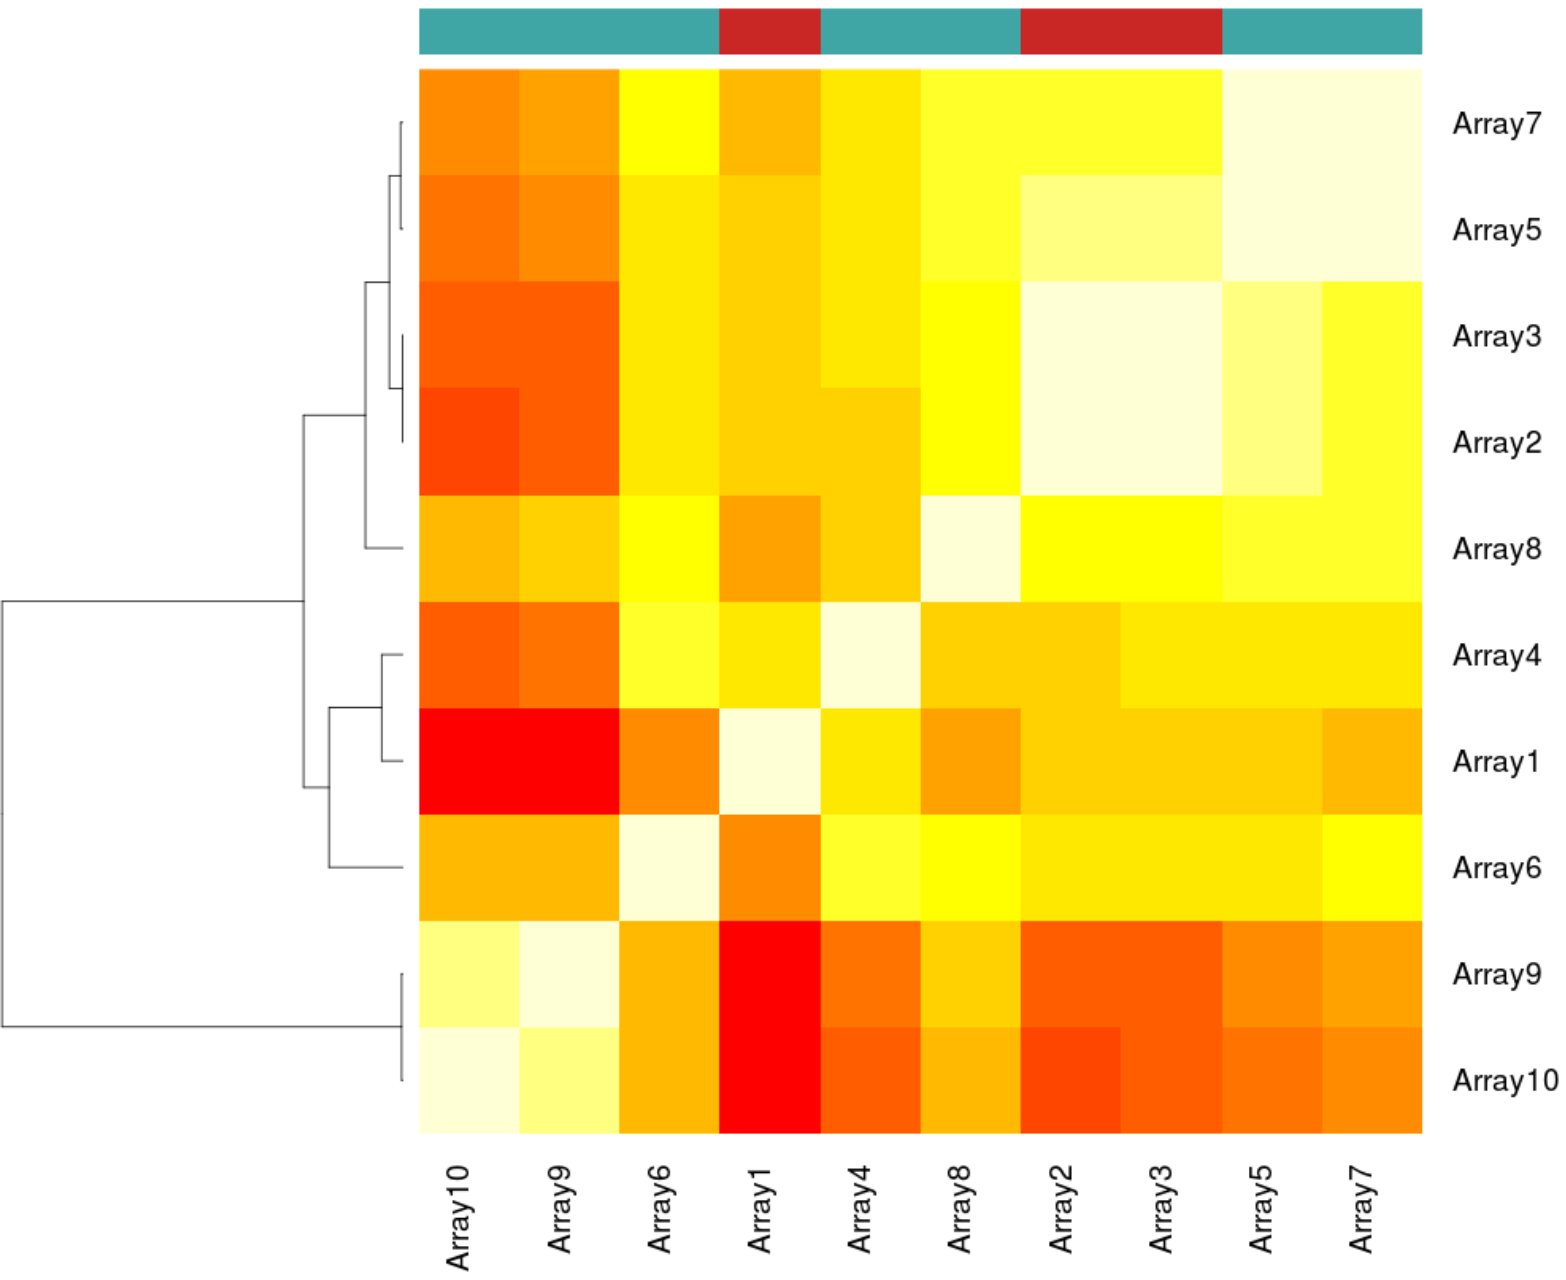

# PCA analysis after GCRMA normalization

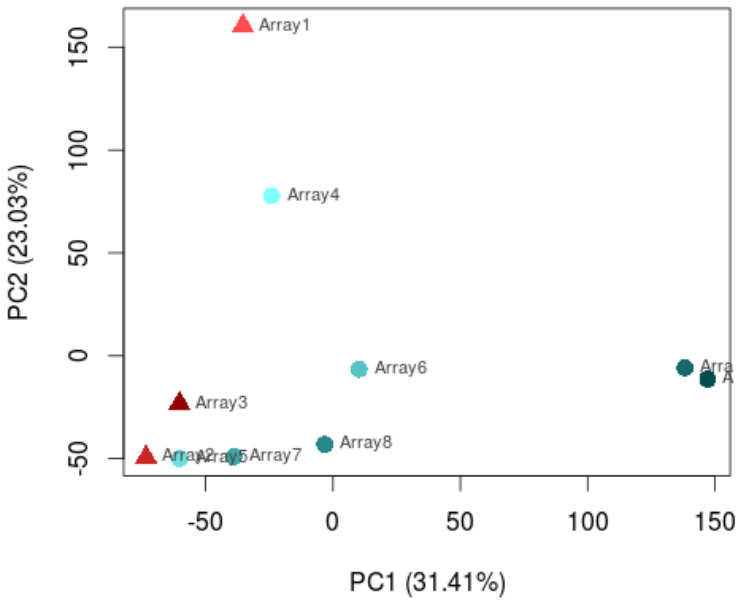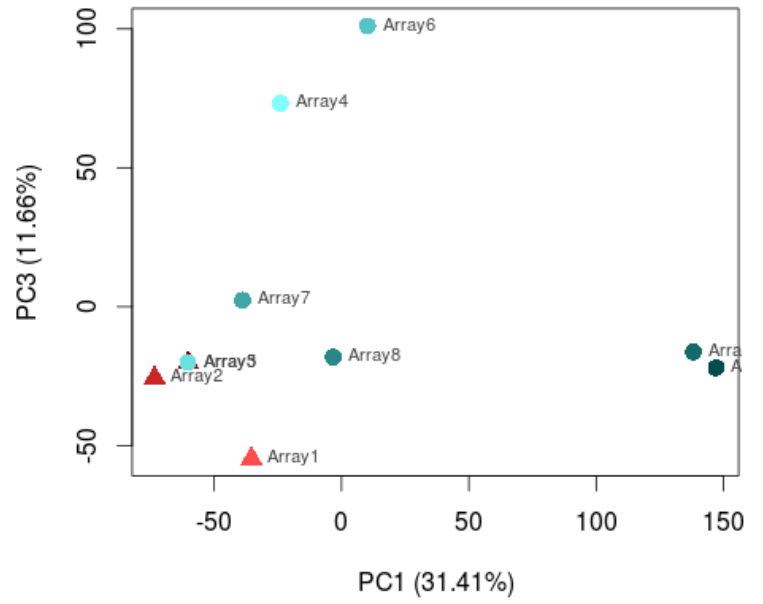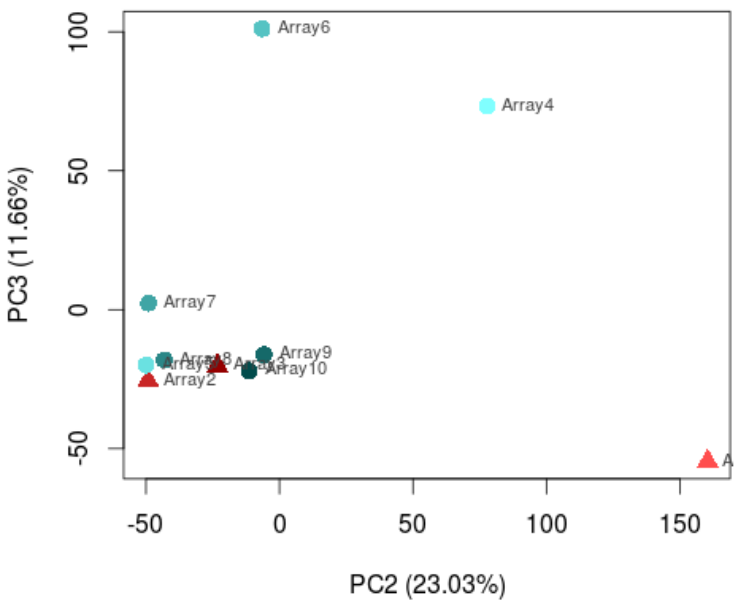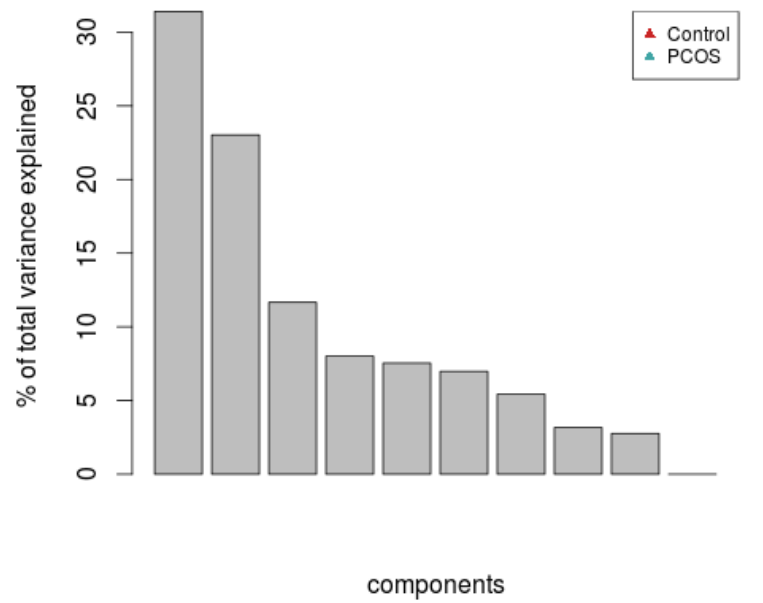

# Cluster dendrogram of GCRMA normalized data

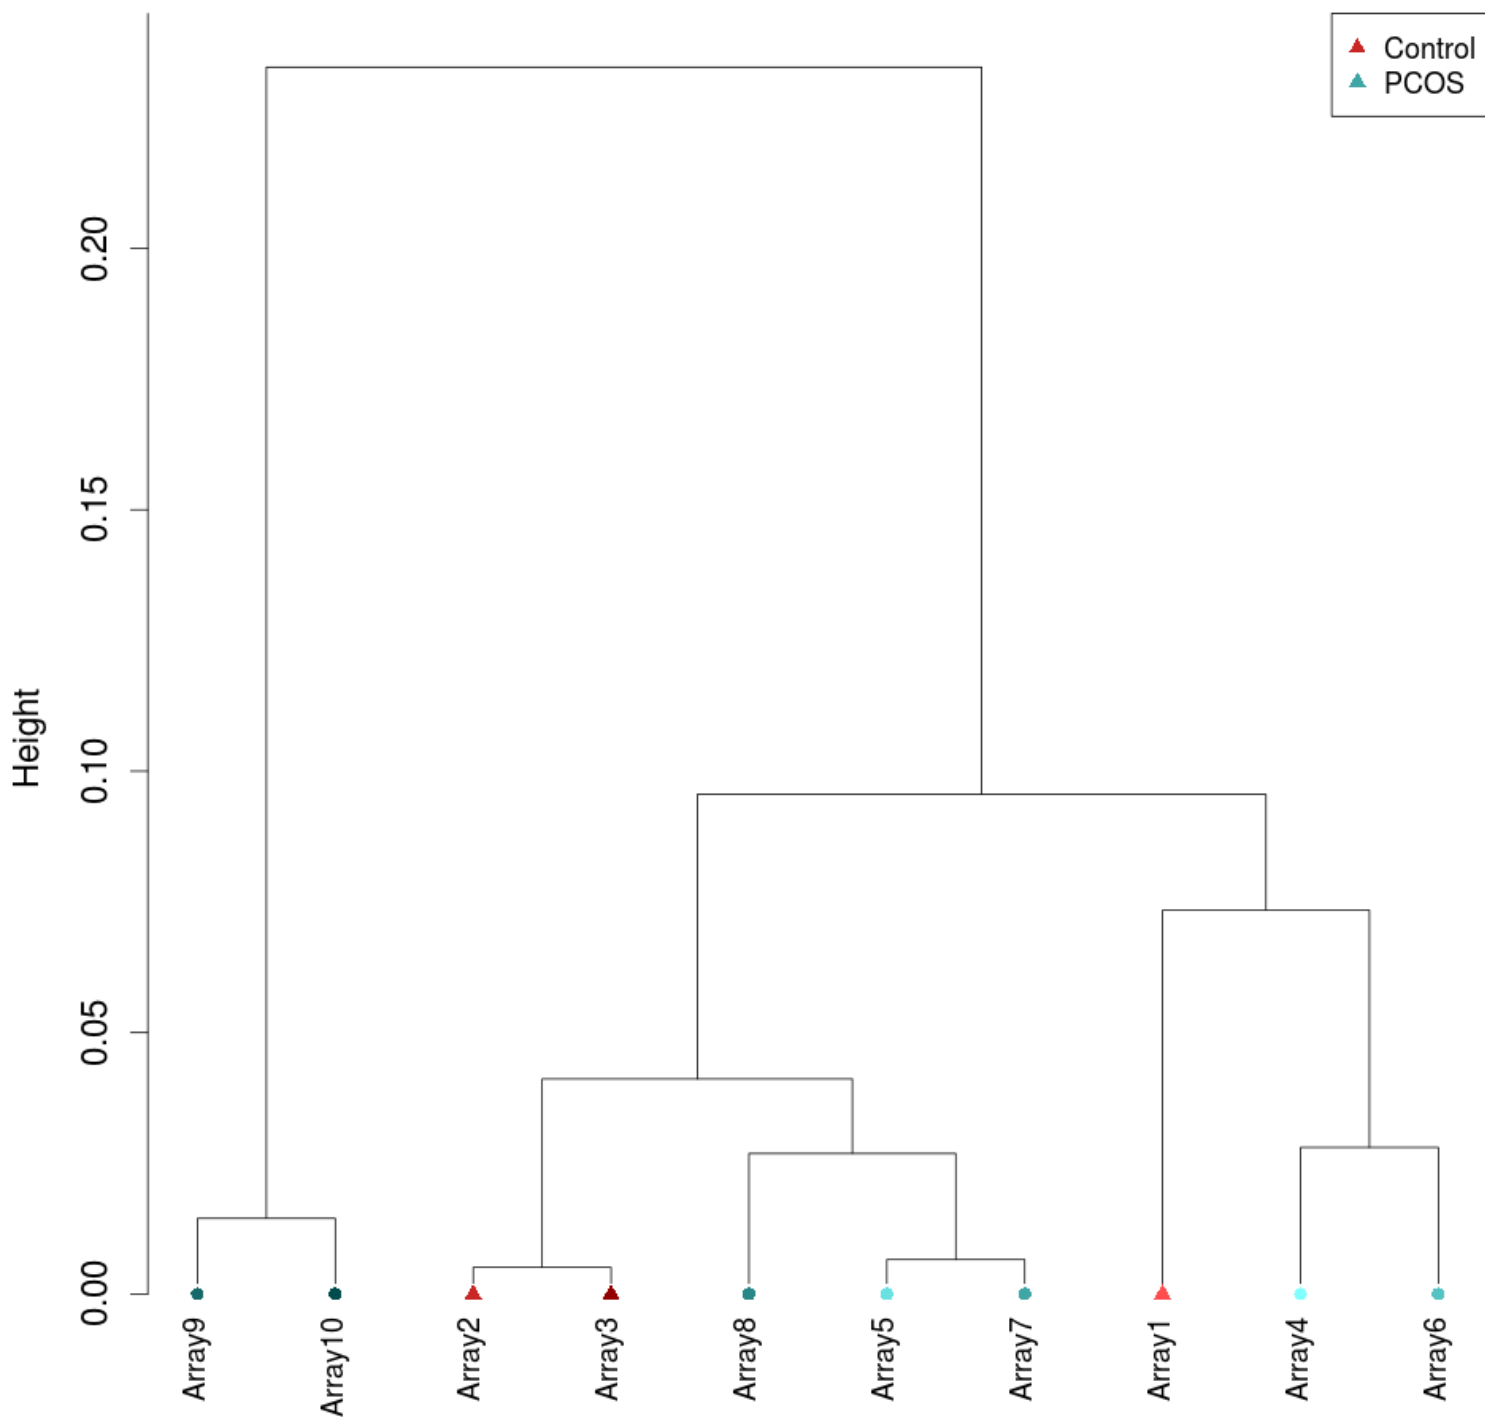

distance: Pearson  
cluster method: ward
