# Supplementary material for: Reactome from a WikiPathways Perspective
Source: PLOS journal article supplement (doi:10.1371/journal.pcbi.1004941), 2016-05-20
Supplement: S4 (10.1371/journal.pcbi.1004941.s004) [file journal.pcbi.1004941.s004]

This figure has been included in the main manuscript as Fig.3(a)

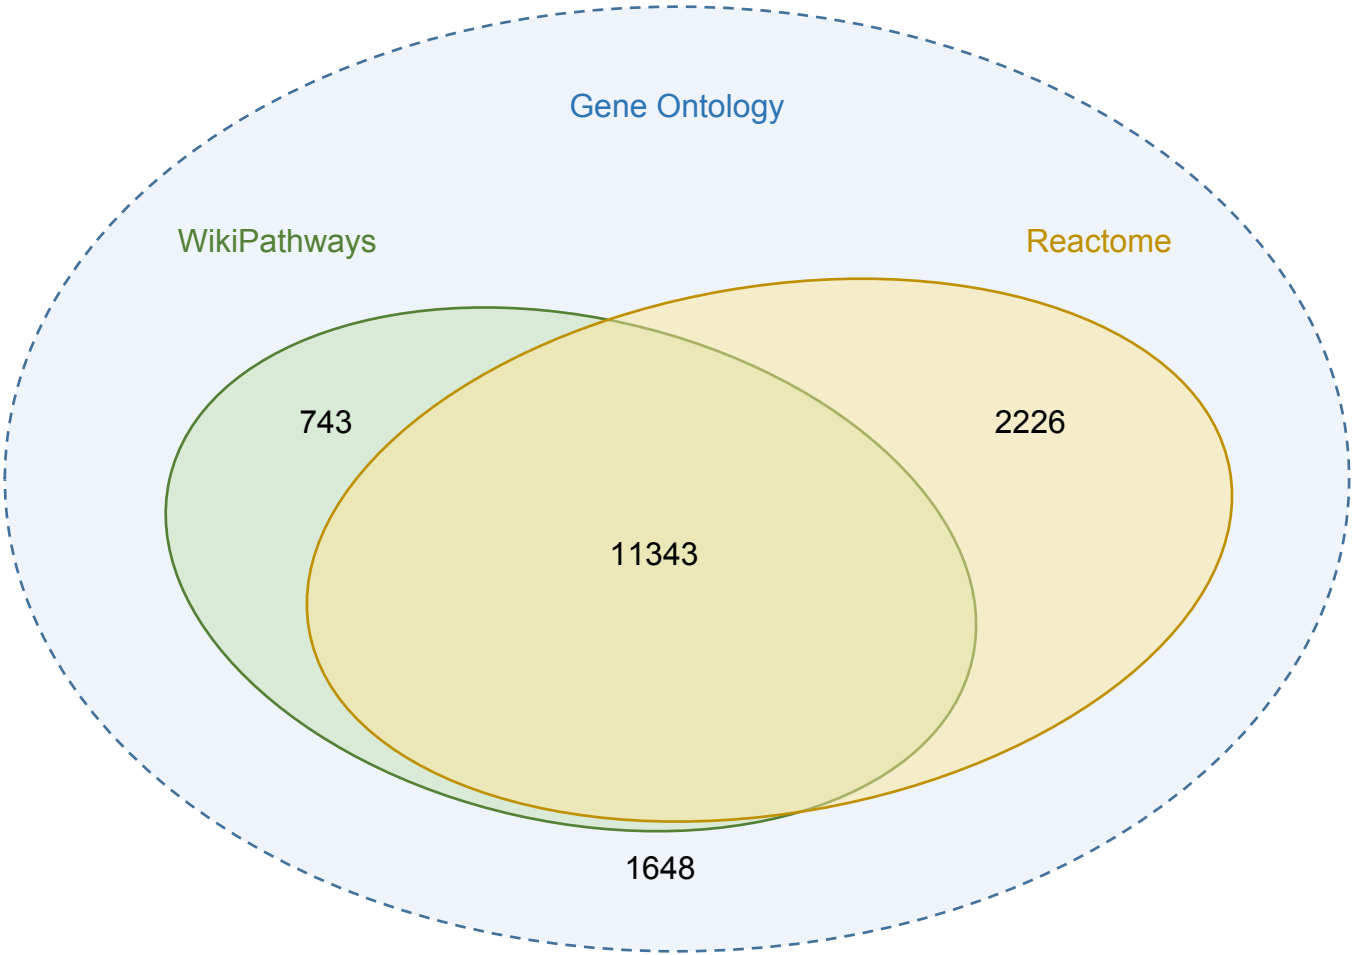

**Fig.1.**Venn Diagram showing coverage of Gene Ontology Terms by gene products of curated collection and reactome\_approved collection of pathways from WikiPathways.

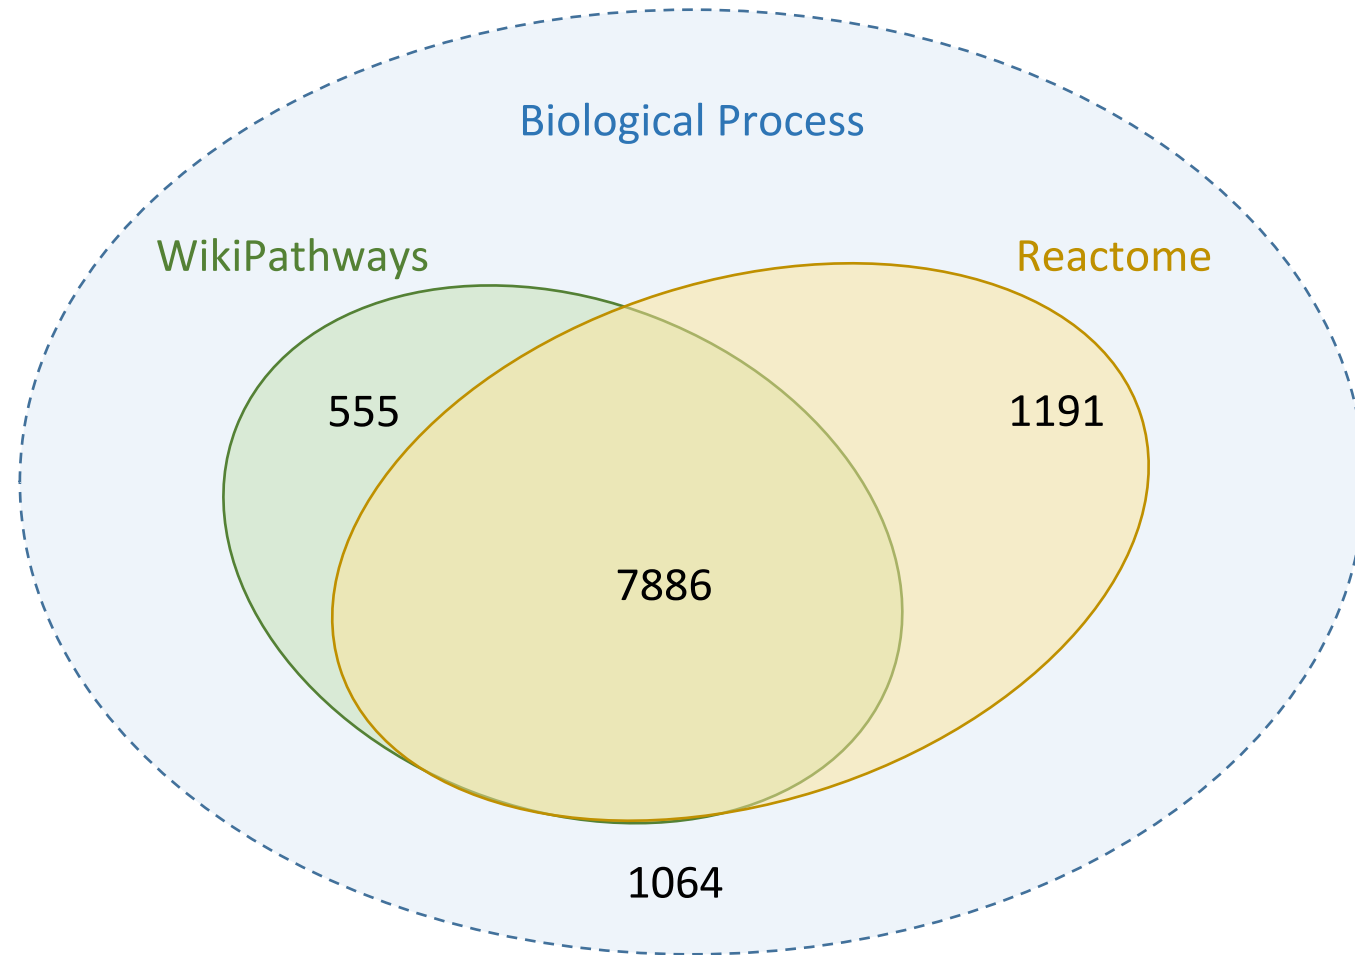

**Fig.2.** Venn Diagram showing coverage of terms from the Biological Process branch of Gene Ontology by gene products of curated collection and reactome\_approved collection of pathways from WikiPathways.

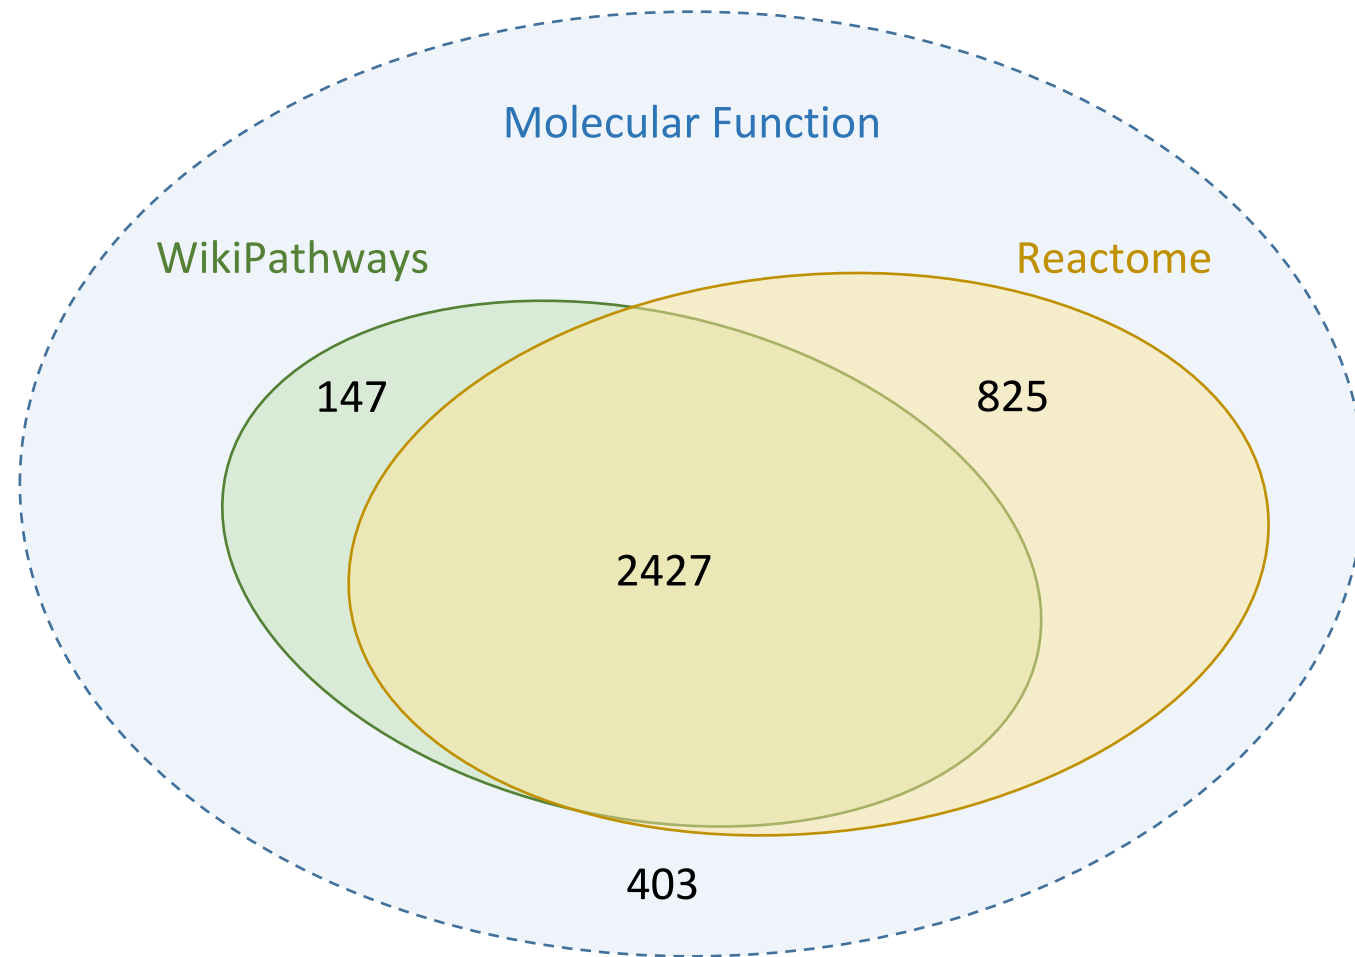

**Fig.3.** Venn Diagram showing coverage of terms from the Molecular Function branch of Gene Ontology by gene products of curated collection and reactome\_approved collection of pathways from WikiPathways.

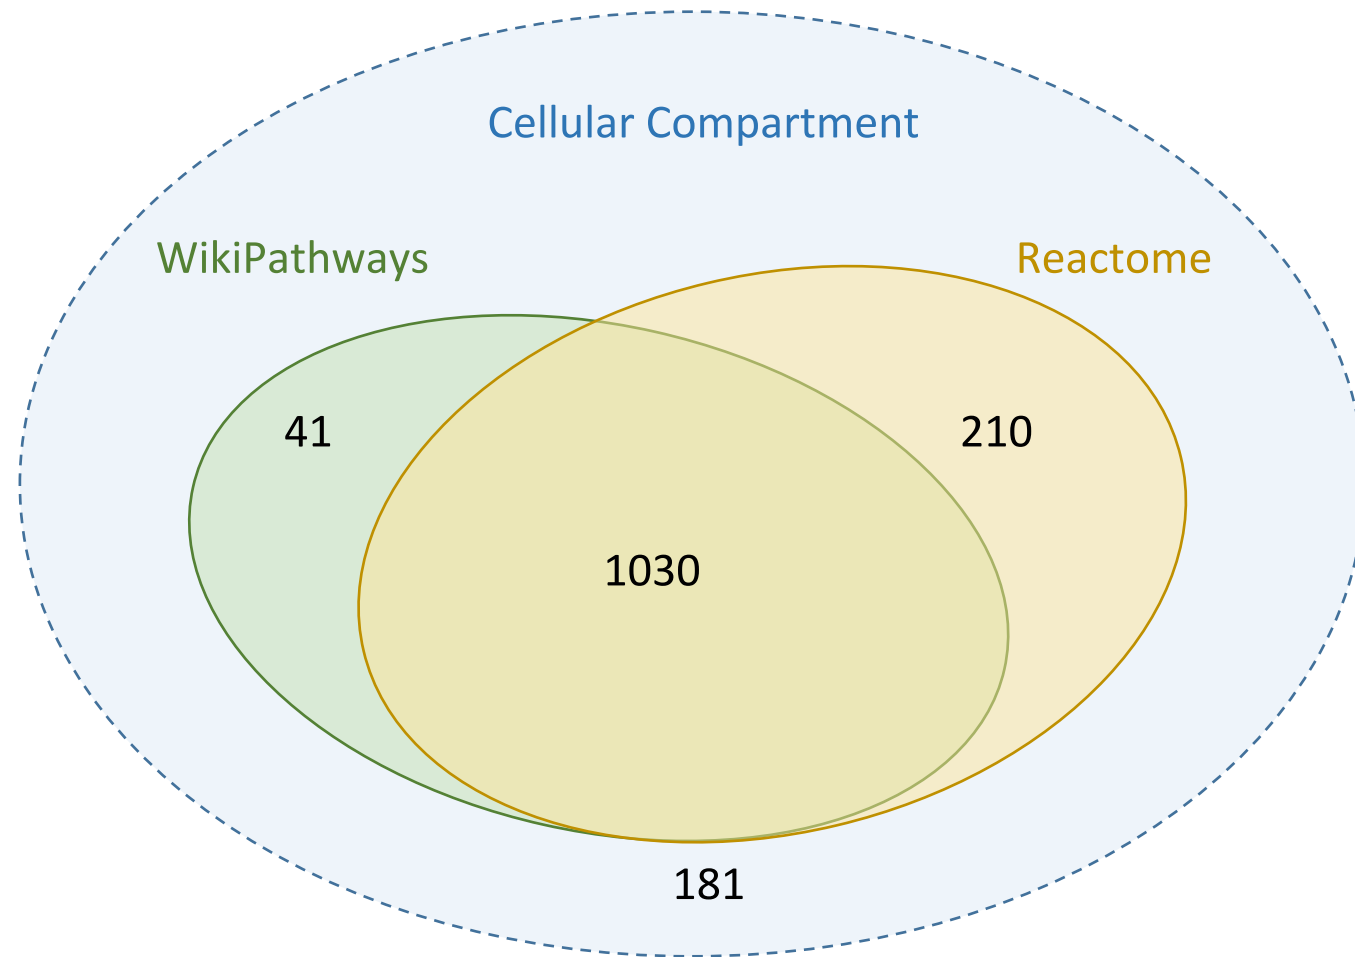

**Fig.4.** Venn Diagram showing coverage of terms from the Cellular Compartment branch of Gene Ontology by gene products of curated collection and reactome\_approved collection of pathways from WikiPathways.

This figure has been included in the main manuscript as Fig.3(b)

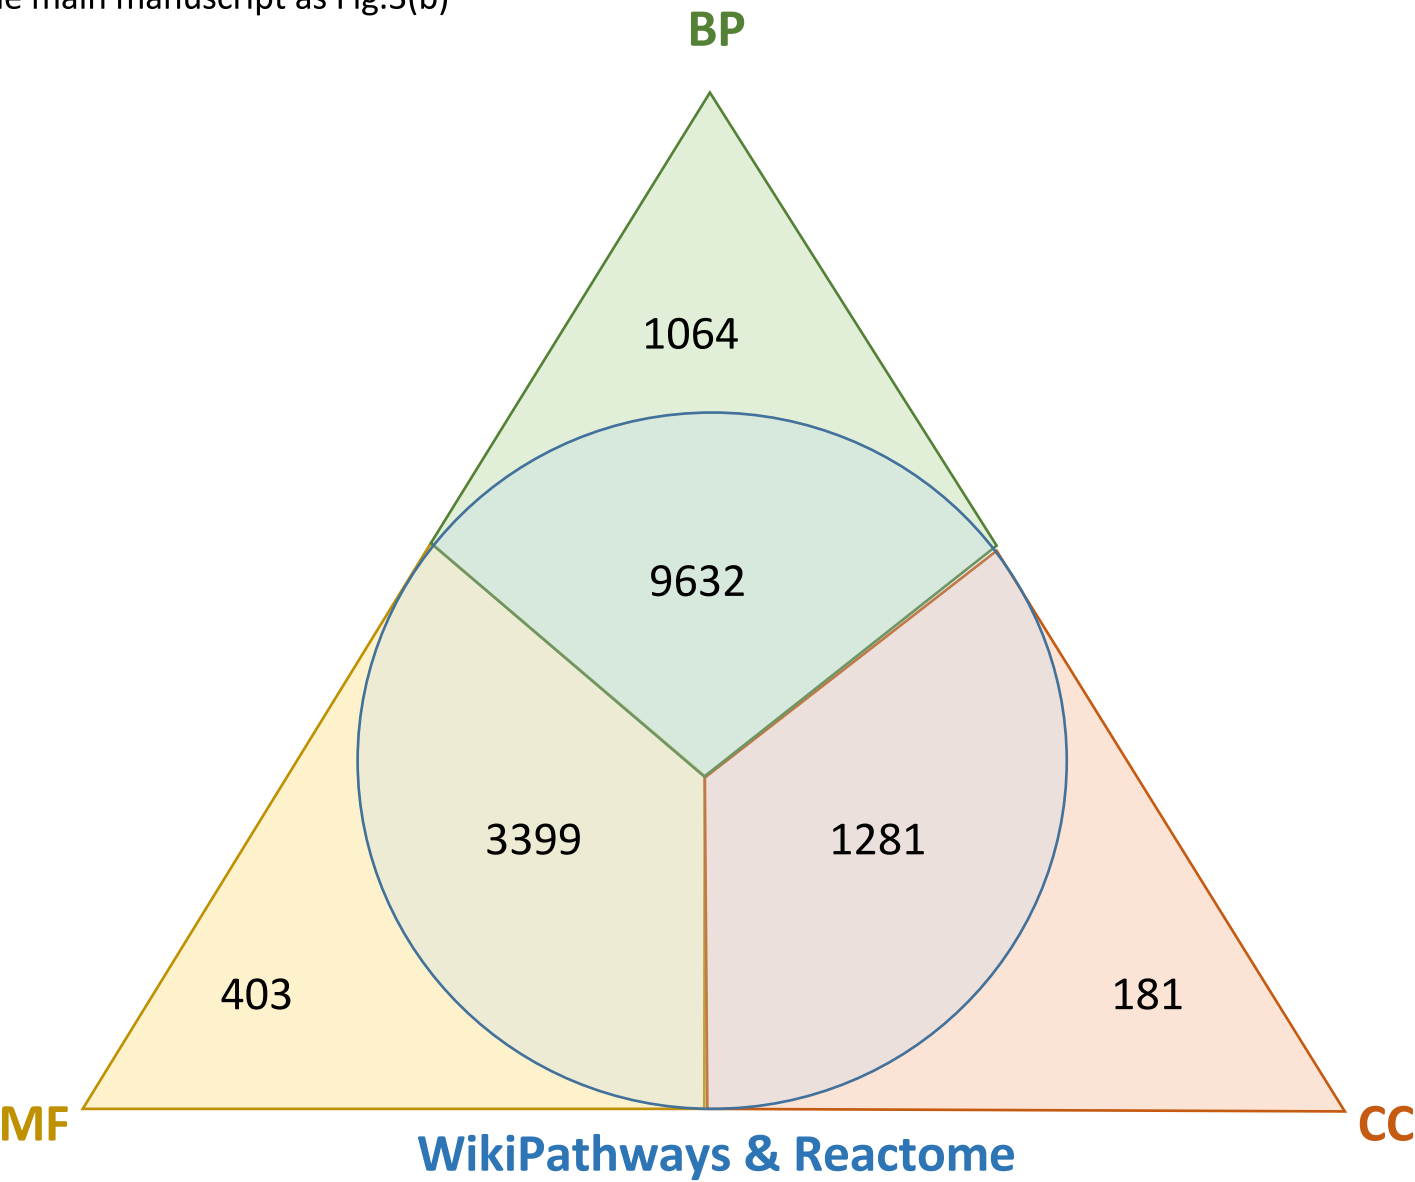

**Fig.5.** Venn Diagram showing coverage of terms from the Biological Process (BP), Molecular Function (MF), and Cellular Compartment (CC) branches of Gene Ontology by gene products of curated collection and reactome\_approved collection of pathways from WikiPathways.

This figure has been included in the main manuscript as Fig.3(c)

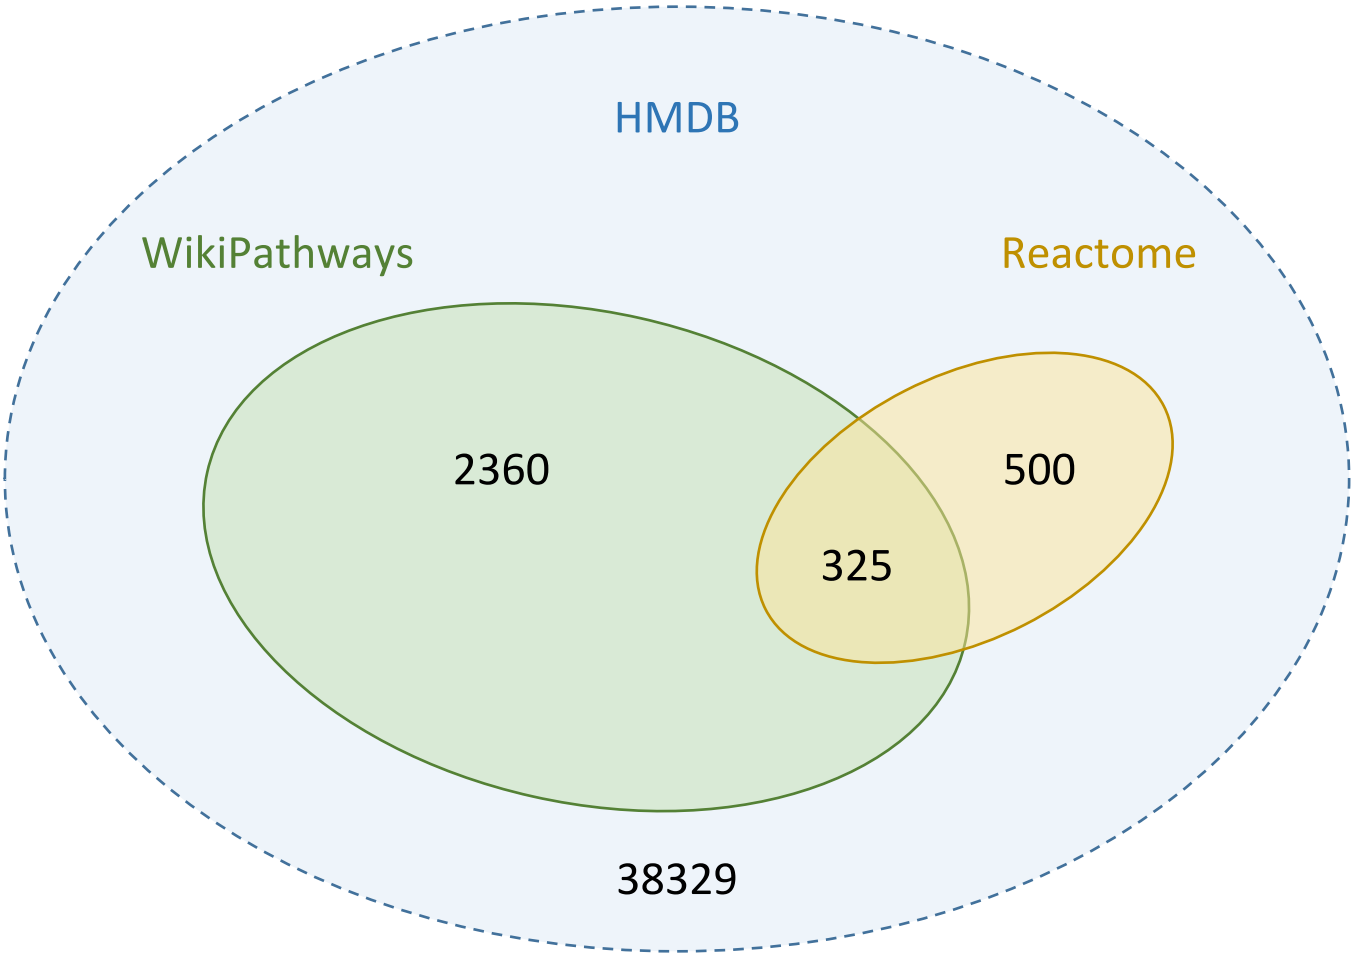

**Fig.7.**Venn Diagram showing coverage of the Human Metabolome Database (HMDB) by metabolites of curated collection and reactome\_approved collection of pathways from WikiPathways.
